# Supplementary material
Source: PubMed Central journal article supplement (PMC7669280)

# Figure S10

## *BTF3*

chr5:72,794,135-72,797,124

1 kb

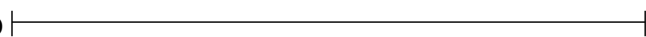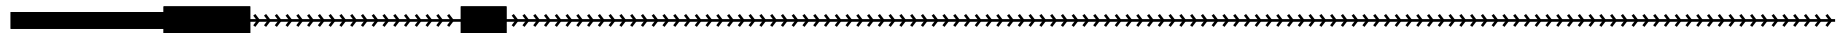

RLFS predicted by QmRLFS-finder (+)

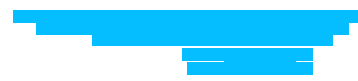

DRIPc-seq (+)

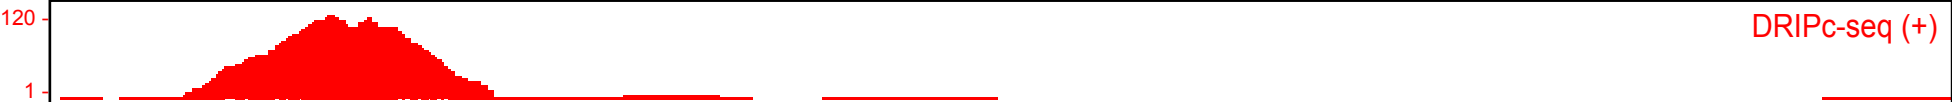

Conversion Frequency (+)

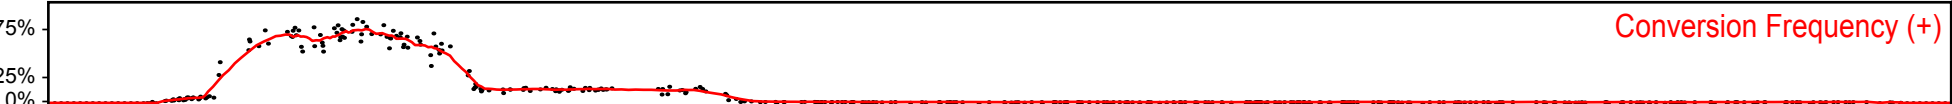

## *PIN4*

chrX: 71,401,153-71,404,487

1 kb

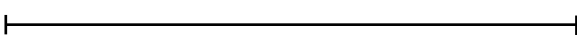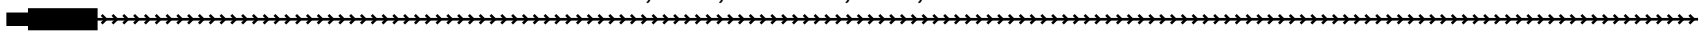

RLFS predicted by QmRLFS-finder (+)

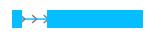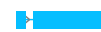

DRIPc-seq (+)

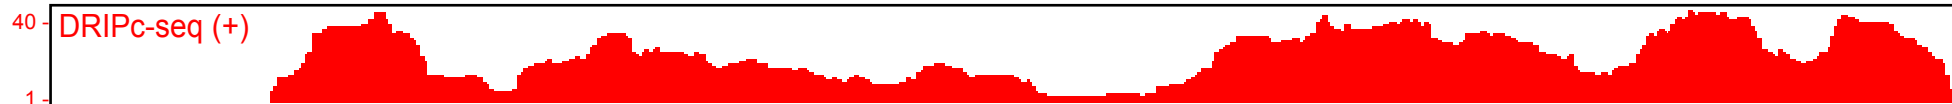

Conversion Frequency (+)

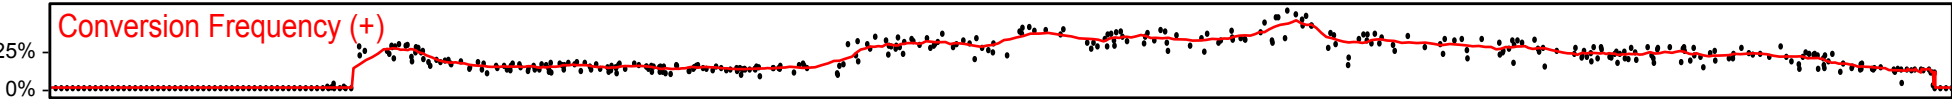

## *CALM3*

chr19:47,111,177-47,113,789

1 kb

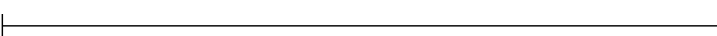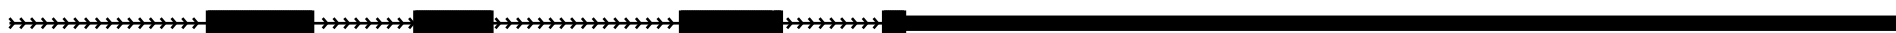

RLFS predicted by QmRLFS-finder (+)

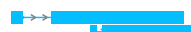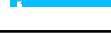

DRIPc-seq (+)

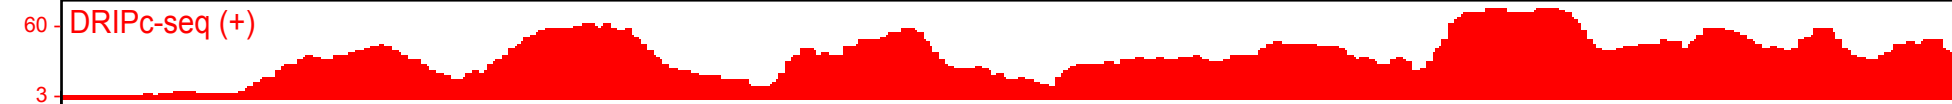

Conversion Frequency (+)

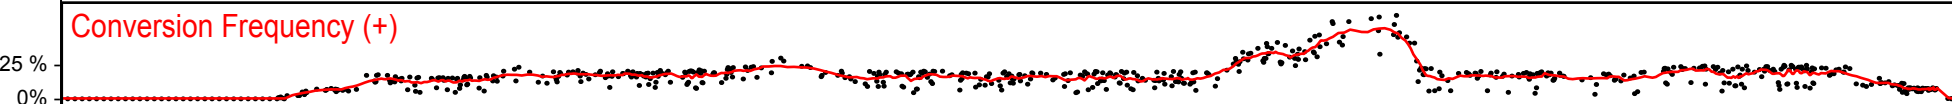

## *RPL13A*

chr19:49,993,082-49,995,655

1 kb

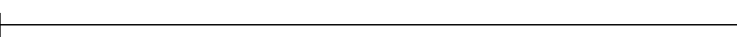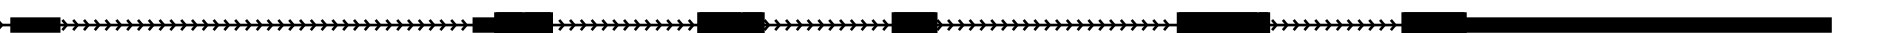

RLFS predicted by QmRLFS-finder (+)

none predicted

DRIPc-seq (+)

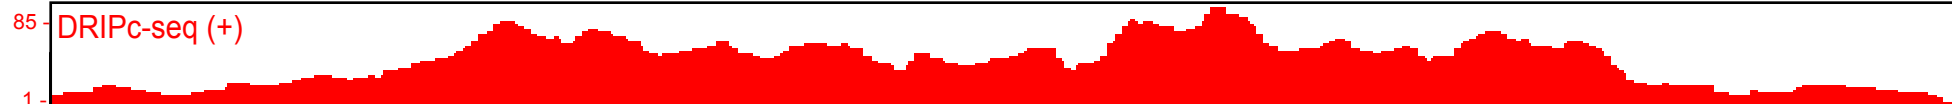

Conversion Frequency (+)

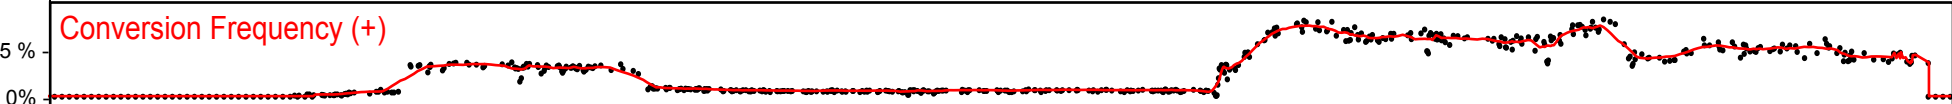

Supplement: NIHMS1568681-supplement-10.pdf [file NIHMS1568681-supplement-10.pdf]
