# Supplementary material
Source: PubMed Central journal article supplement (PMC7669280)
Supplement: NIHMS1568681-supplement-1.pdf [file NIHMS1568681-supplement-1.pdf]

Figure S1

**A**

Gentle DNA isolation and restriction enzyme treatment

**R-loop:**

positive  
negative

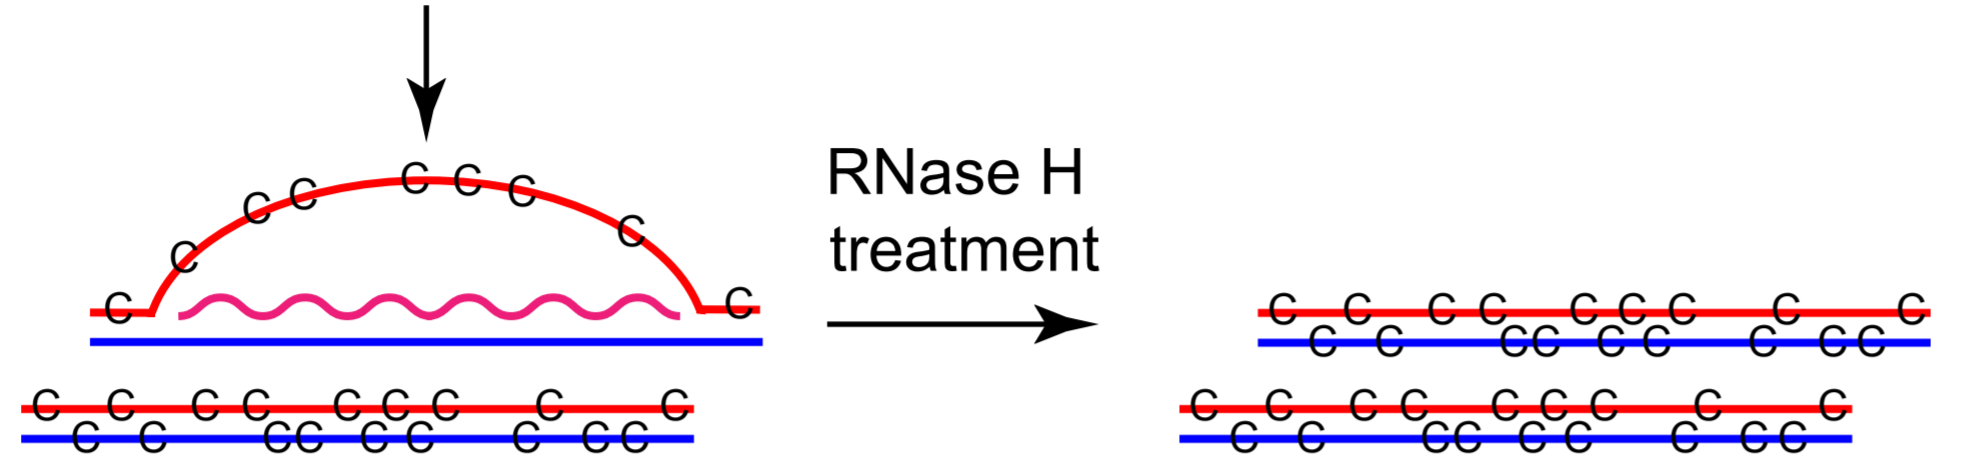

Non-denaturing bisulfite treatment

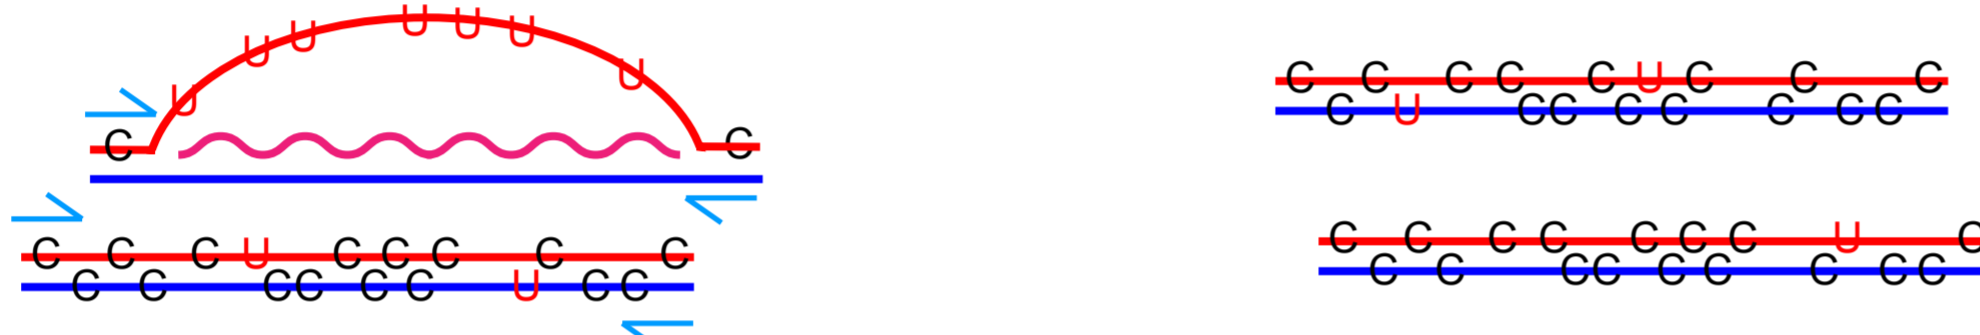

**Amplified from:**

Site specific PCR amplification

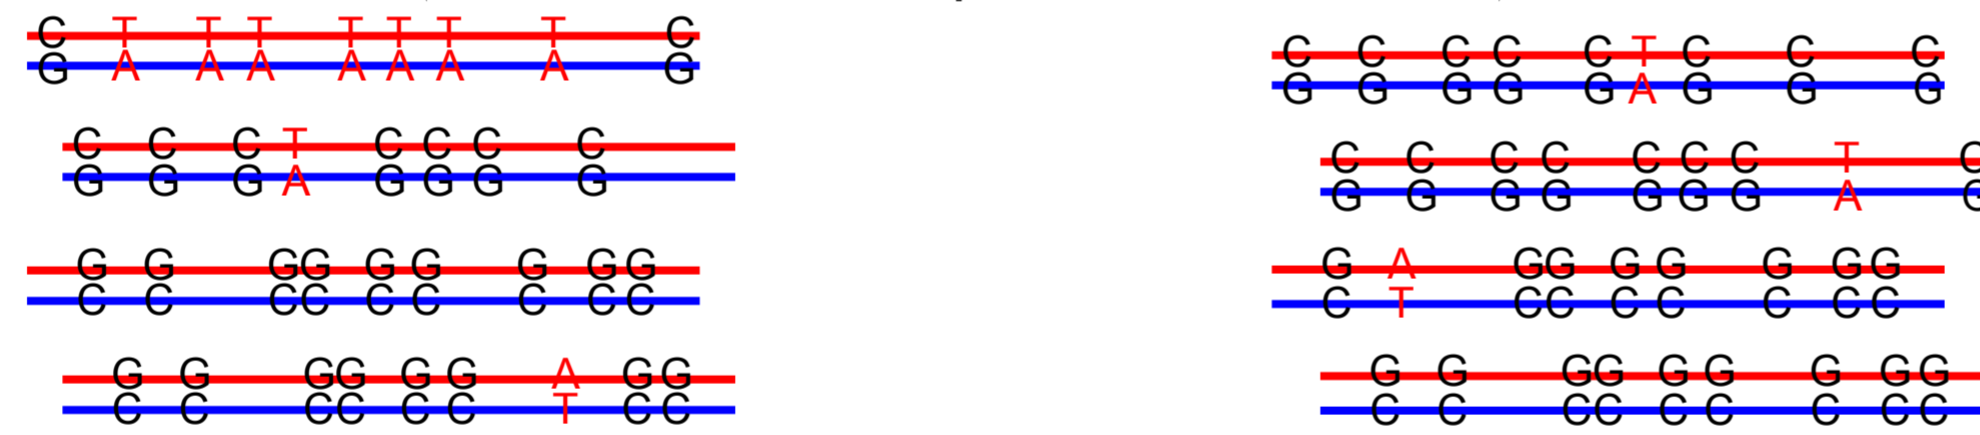

Top strand

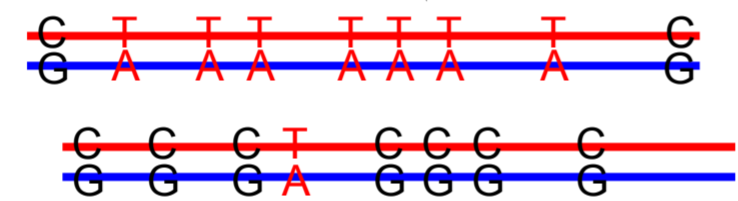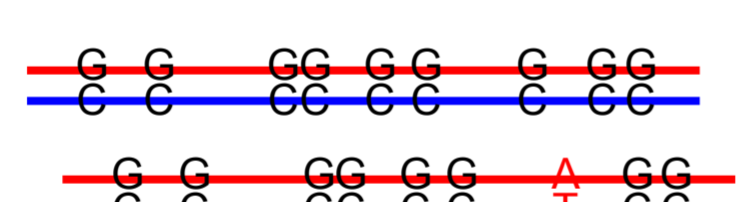

Bottom strand

SMRTbell library construction

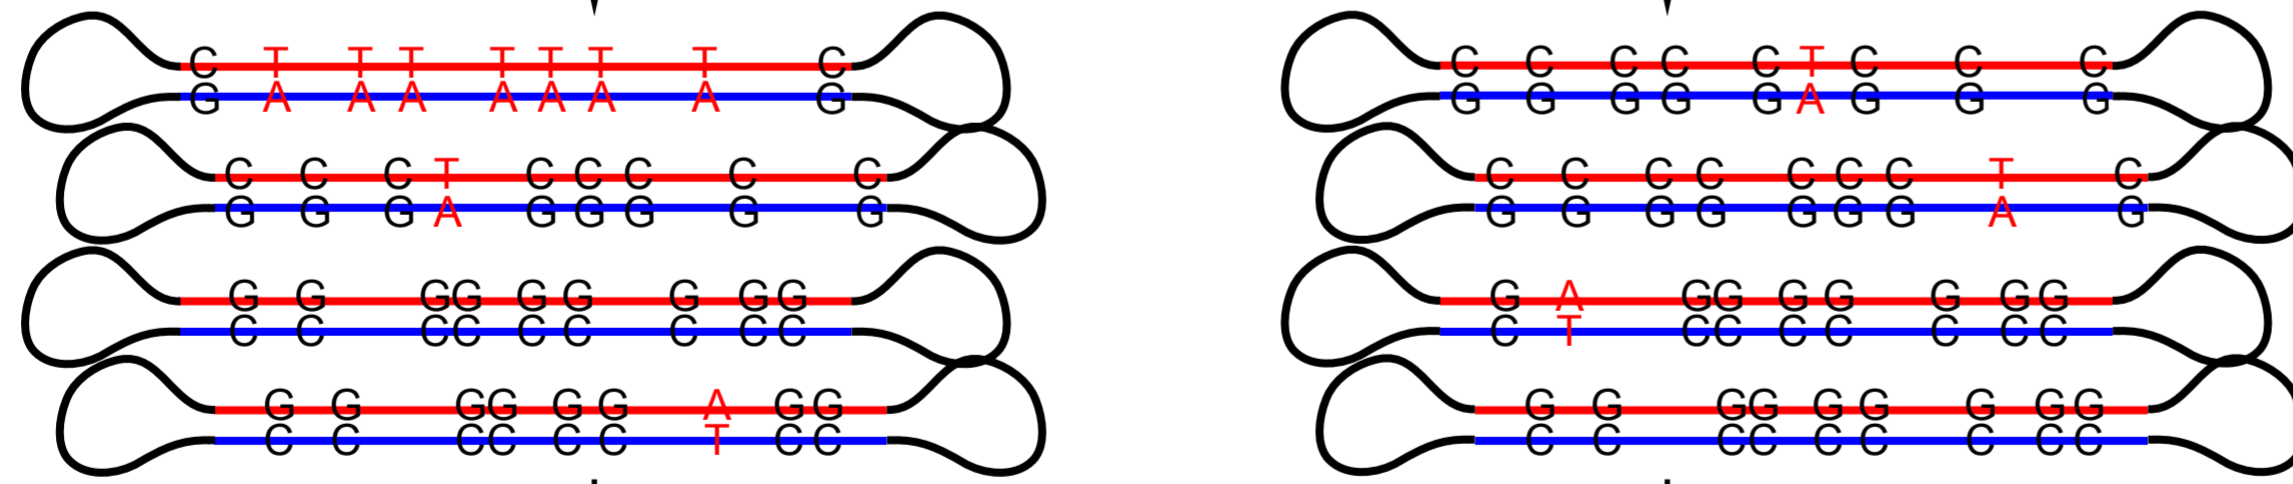

SMRT sequencing & Computational processing

**B**

CCS read generation (ConsensusTools)

Remove PCR duplicates (Dedupe)

Map reads & assign strand (footLoop (Bismark))

Call conversion tracks (footPeak)

Cluster peak calls (footClust)

Visualization (footPeak\_graph)

*Gargamel* pipeline overview for SMRF-seq analysis

|               |  | Strand? | Peak? |        |    |
|---------------|--|---------|-------|--------|----|
| Molecule 1    |  | Top     | Yes   | Top    | No |
| Molecule 2    |  | Top     | No    | Top    | No |
| Molecule 3 or |  | ?       | No    | Bottom | No |
| Molecule 4    |  | Bottom  | No    | ?      | No |
