# Supplementary material
Source: PubMed Central journal article supplement (PMC7669280)

Figure S11

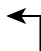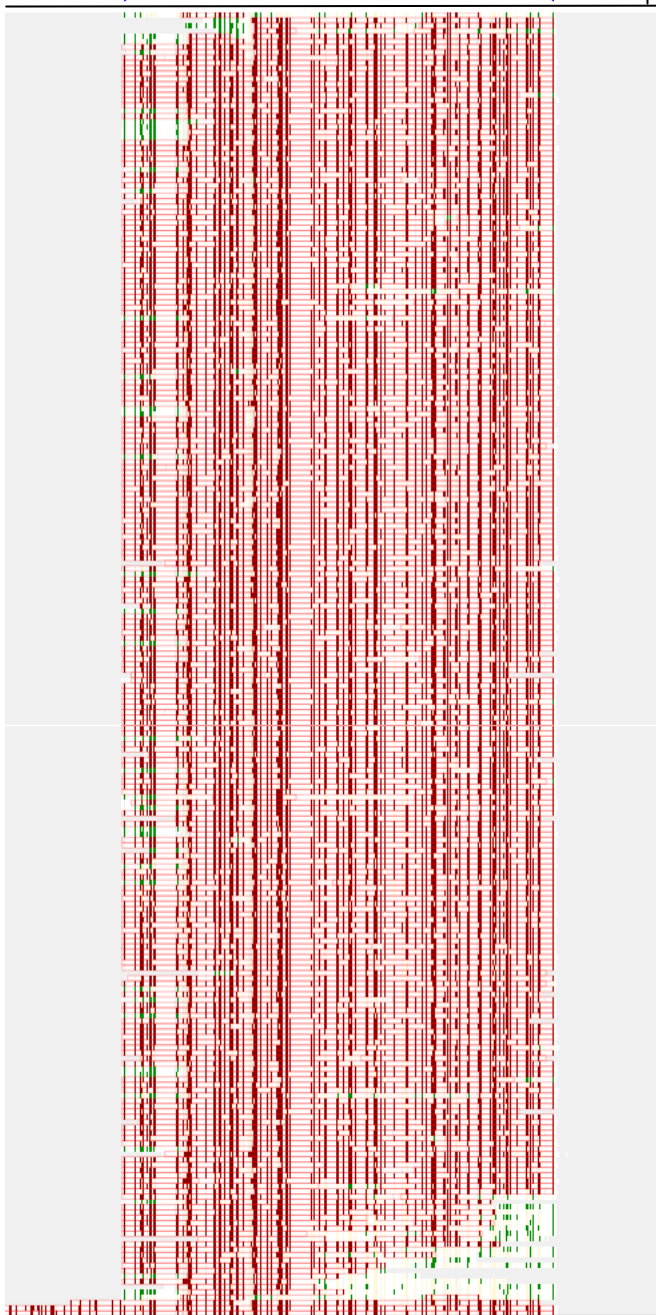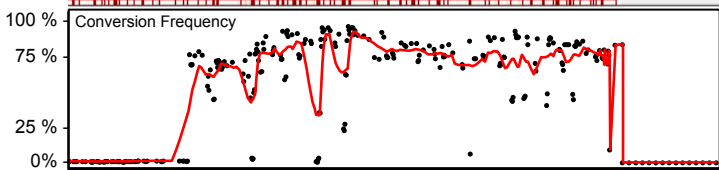

Supplement: NIHMS1568681-supplement-11.pdf [file NIHMS1568681-supplement-11.pdf]

Figure S2

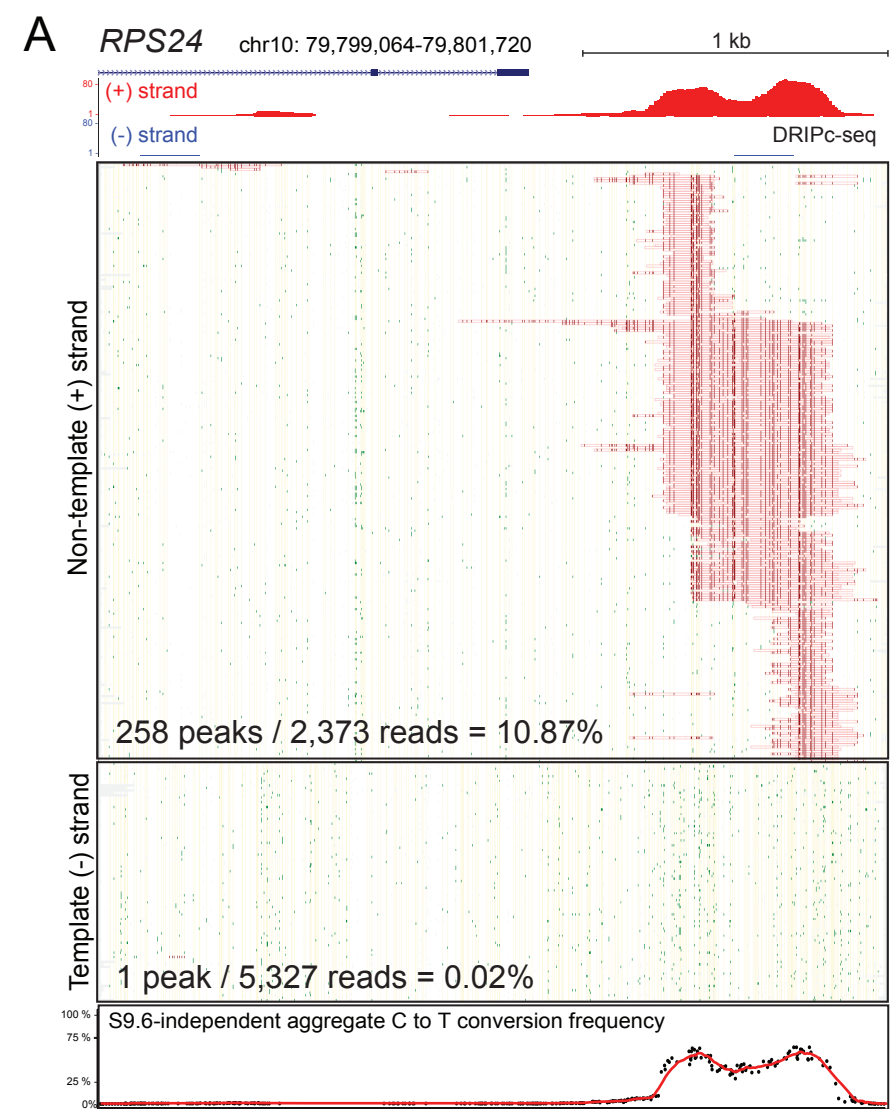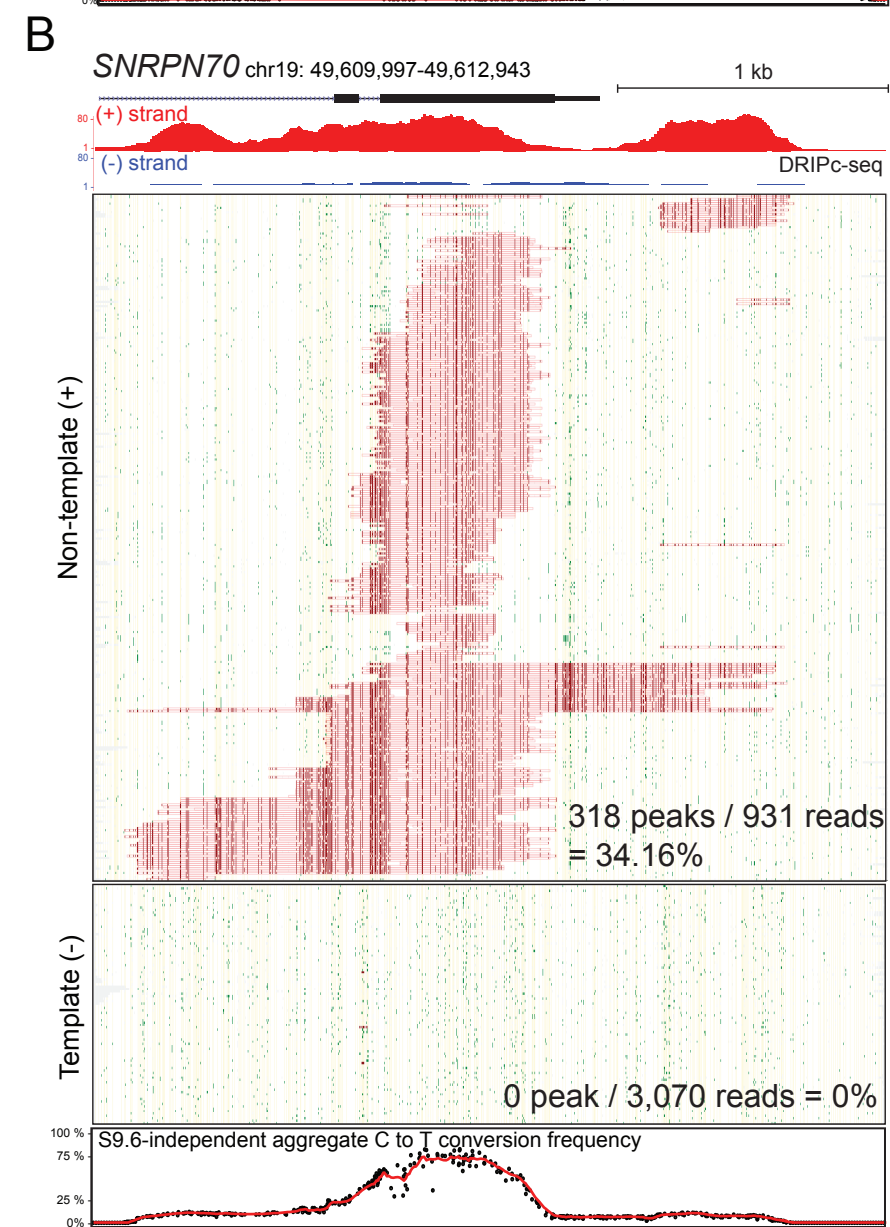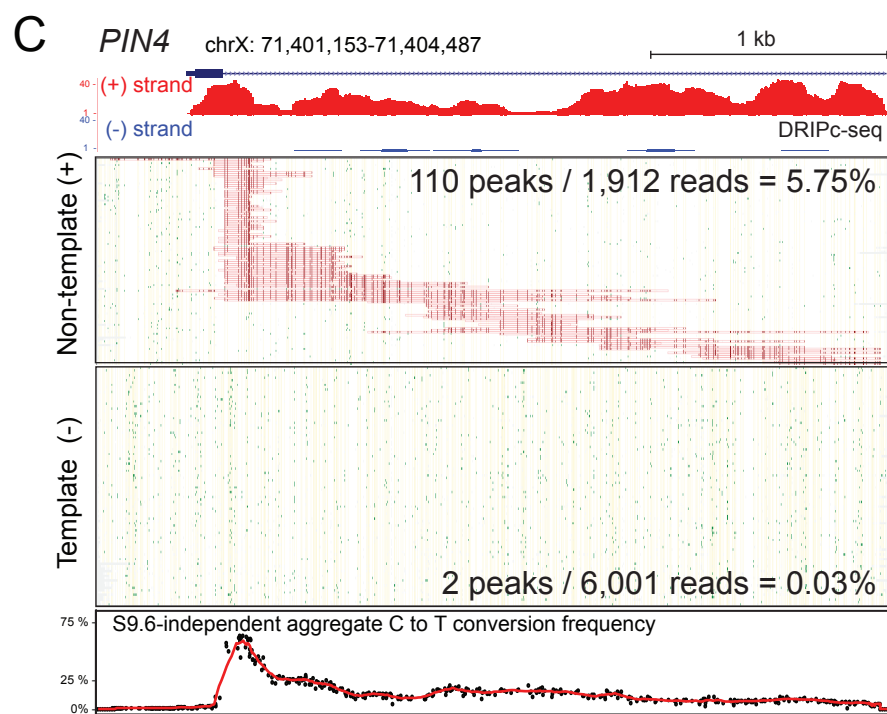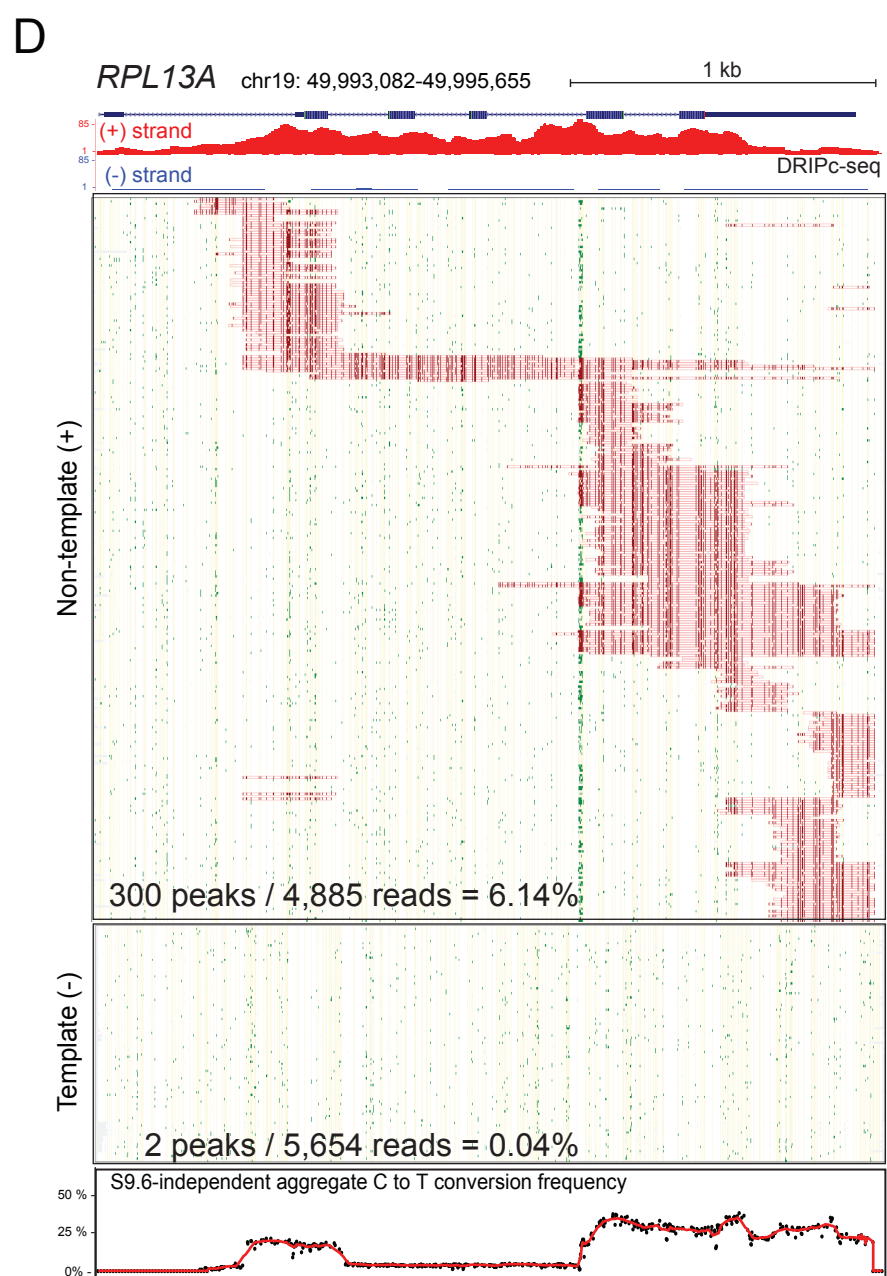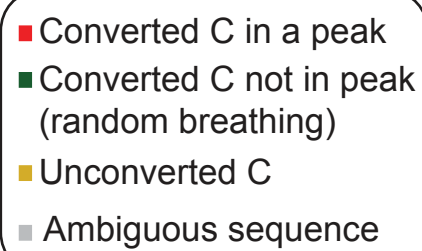

Supplement: NIHMS1568681-supplement-2.pdf [file NIHMS1568681-supplement-2.pdf]

Figure S3

*RPL13A*

chr19: 49,993,082 - 49,995,655

1 kb

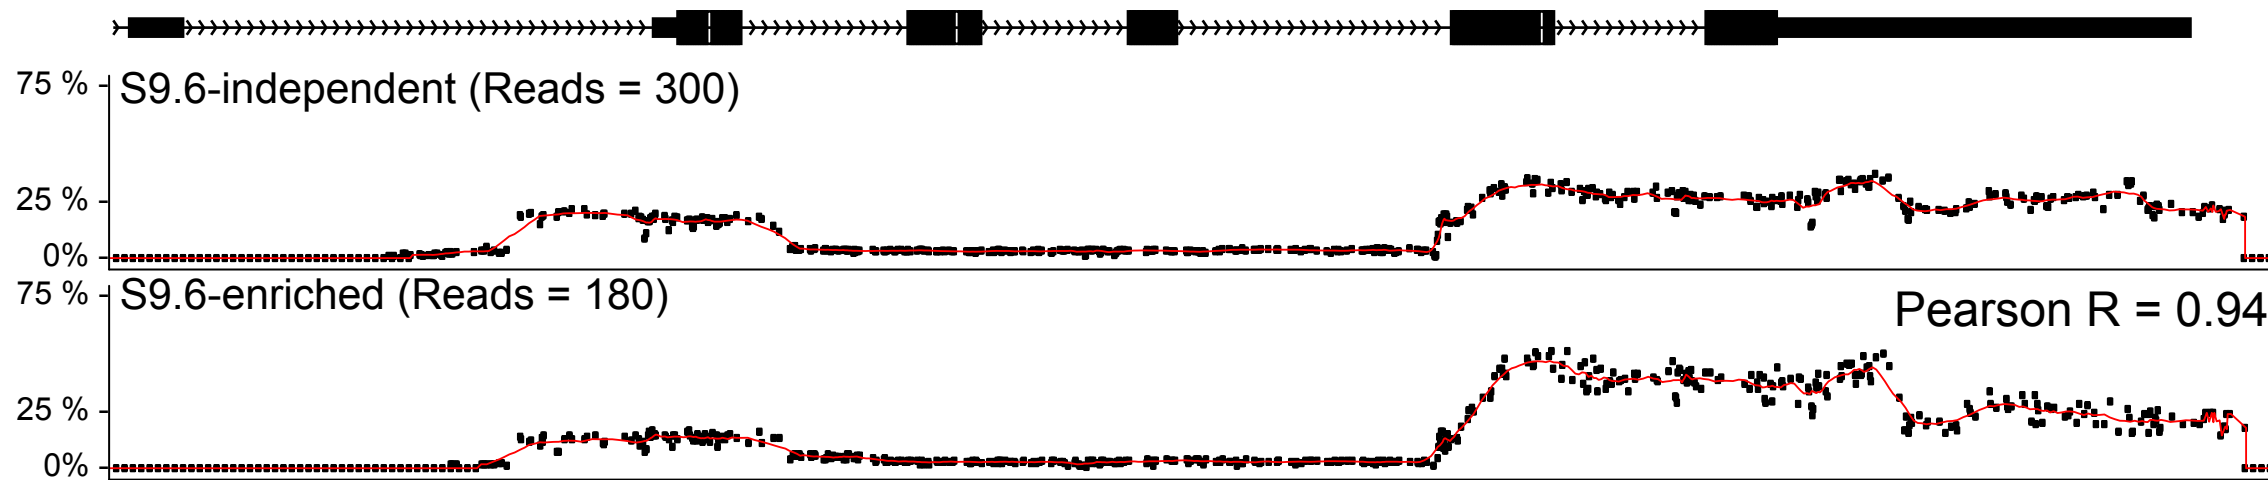

*PIN4*

chrX: 71,401,153 - 71,404,487

1 kb

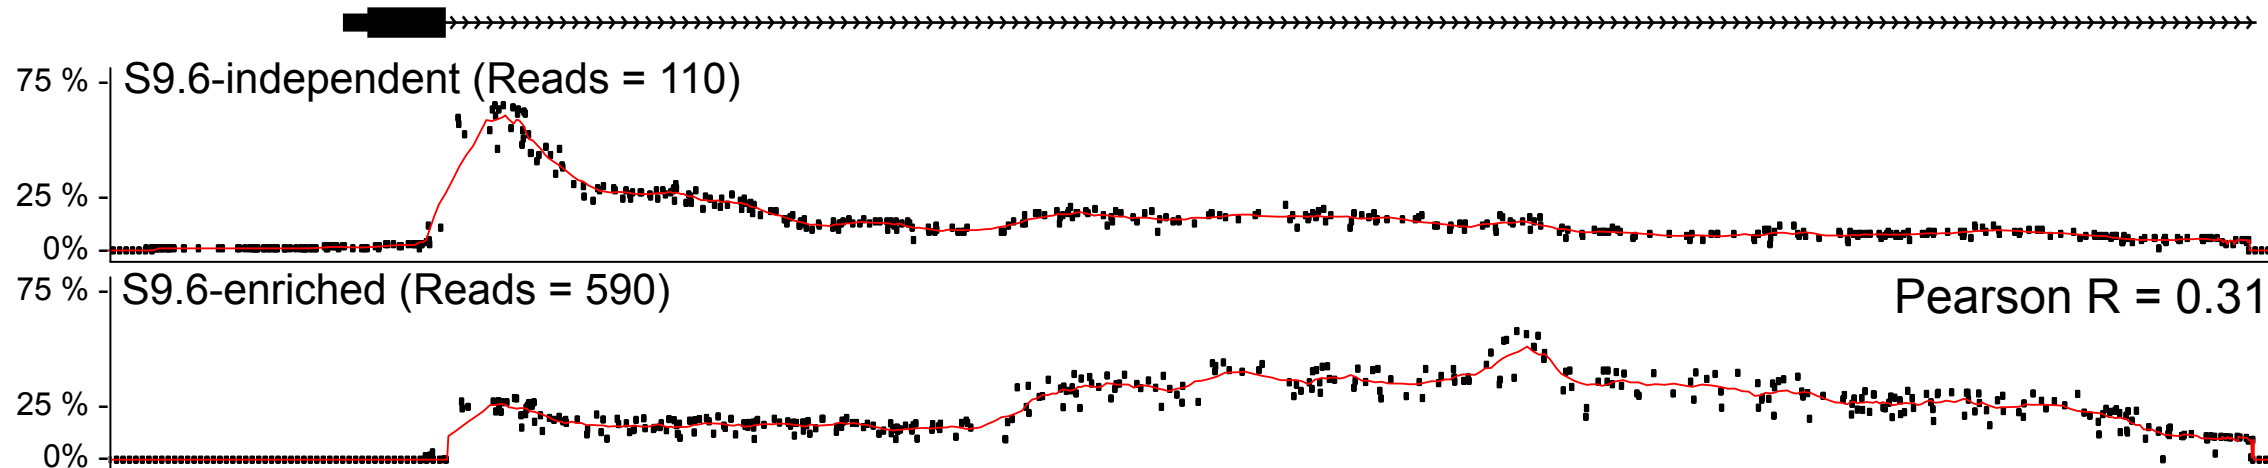

*SNRPN70*

1 kb

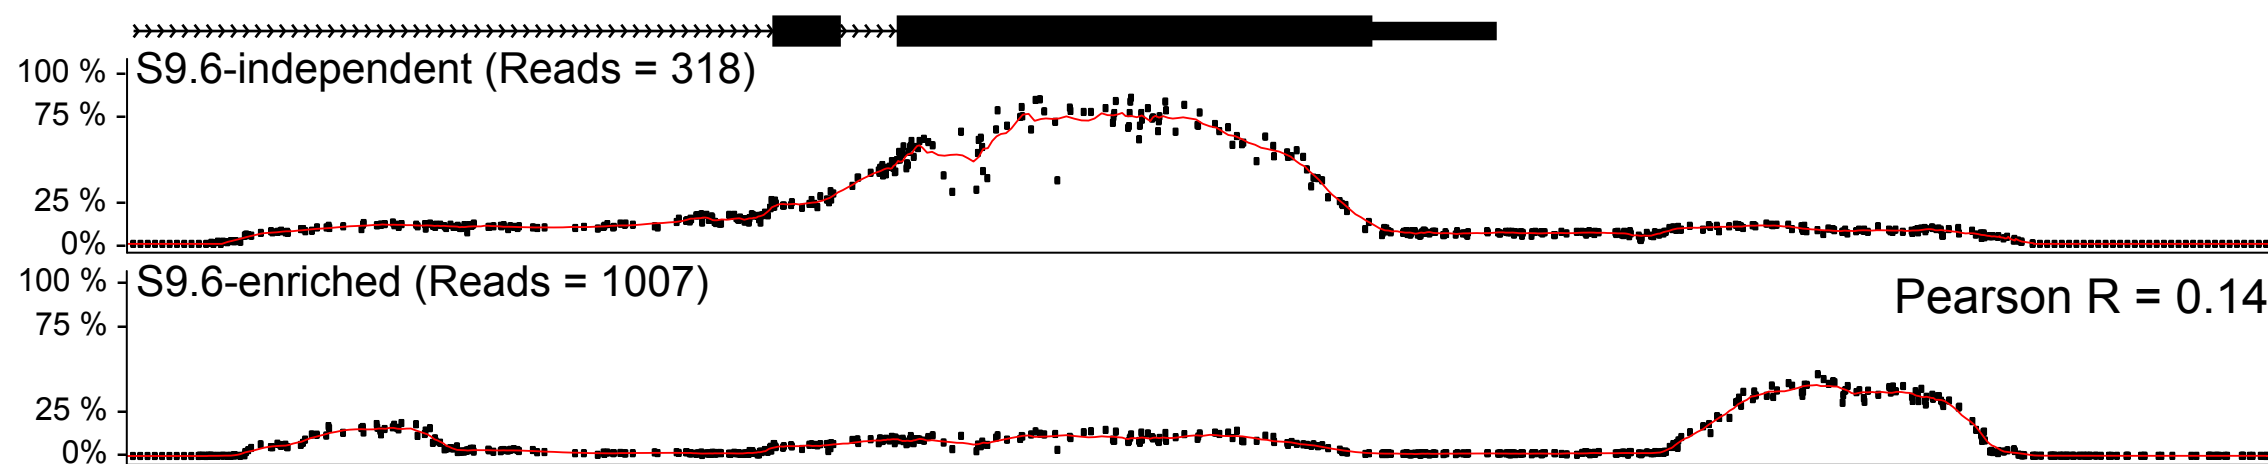

*CALM3*

chr19: 47,111,177 - 47,113,789

1 kb

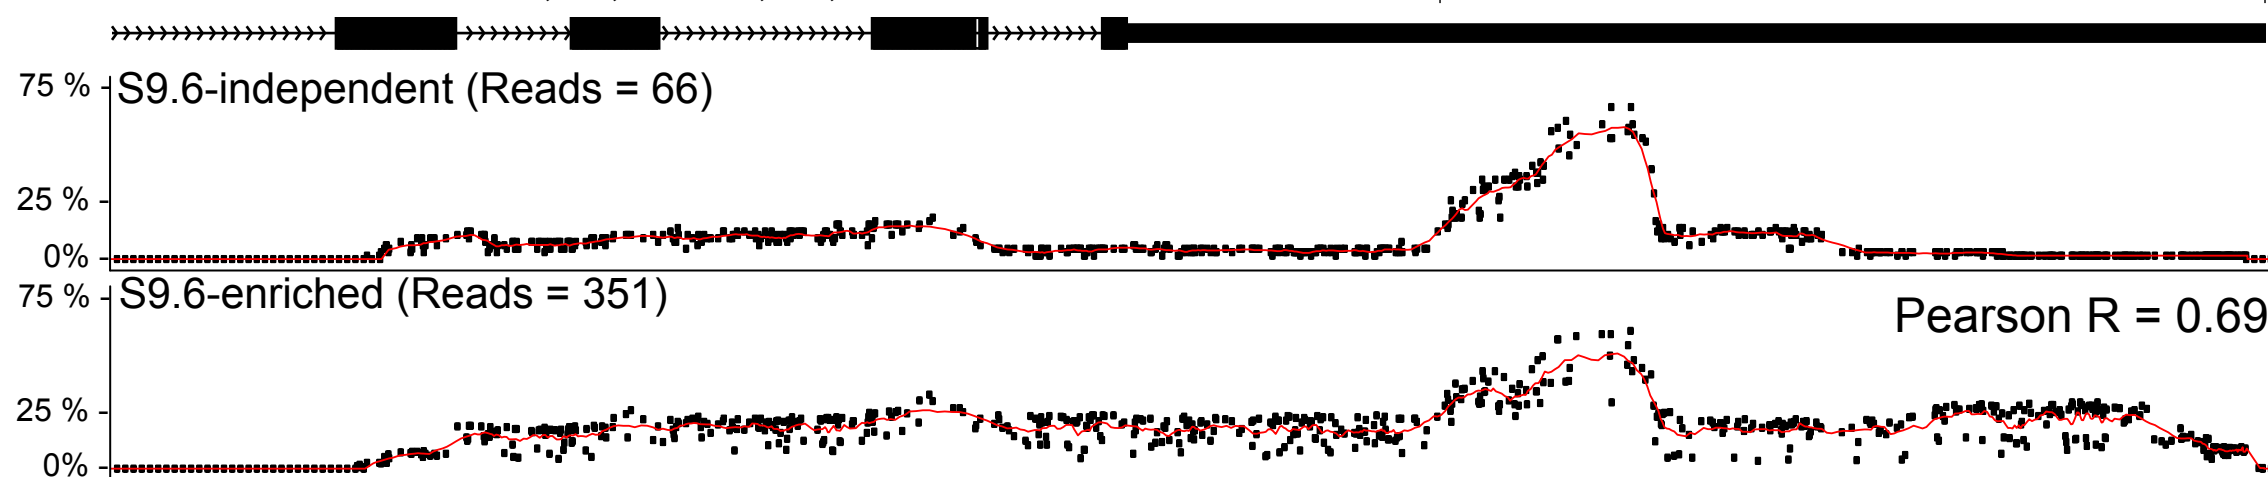

Supplement: NIHMS1568681-supplement-3.pdf [file NIHMS1568681-supplement-3.pdf]

# Figure S4

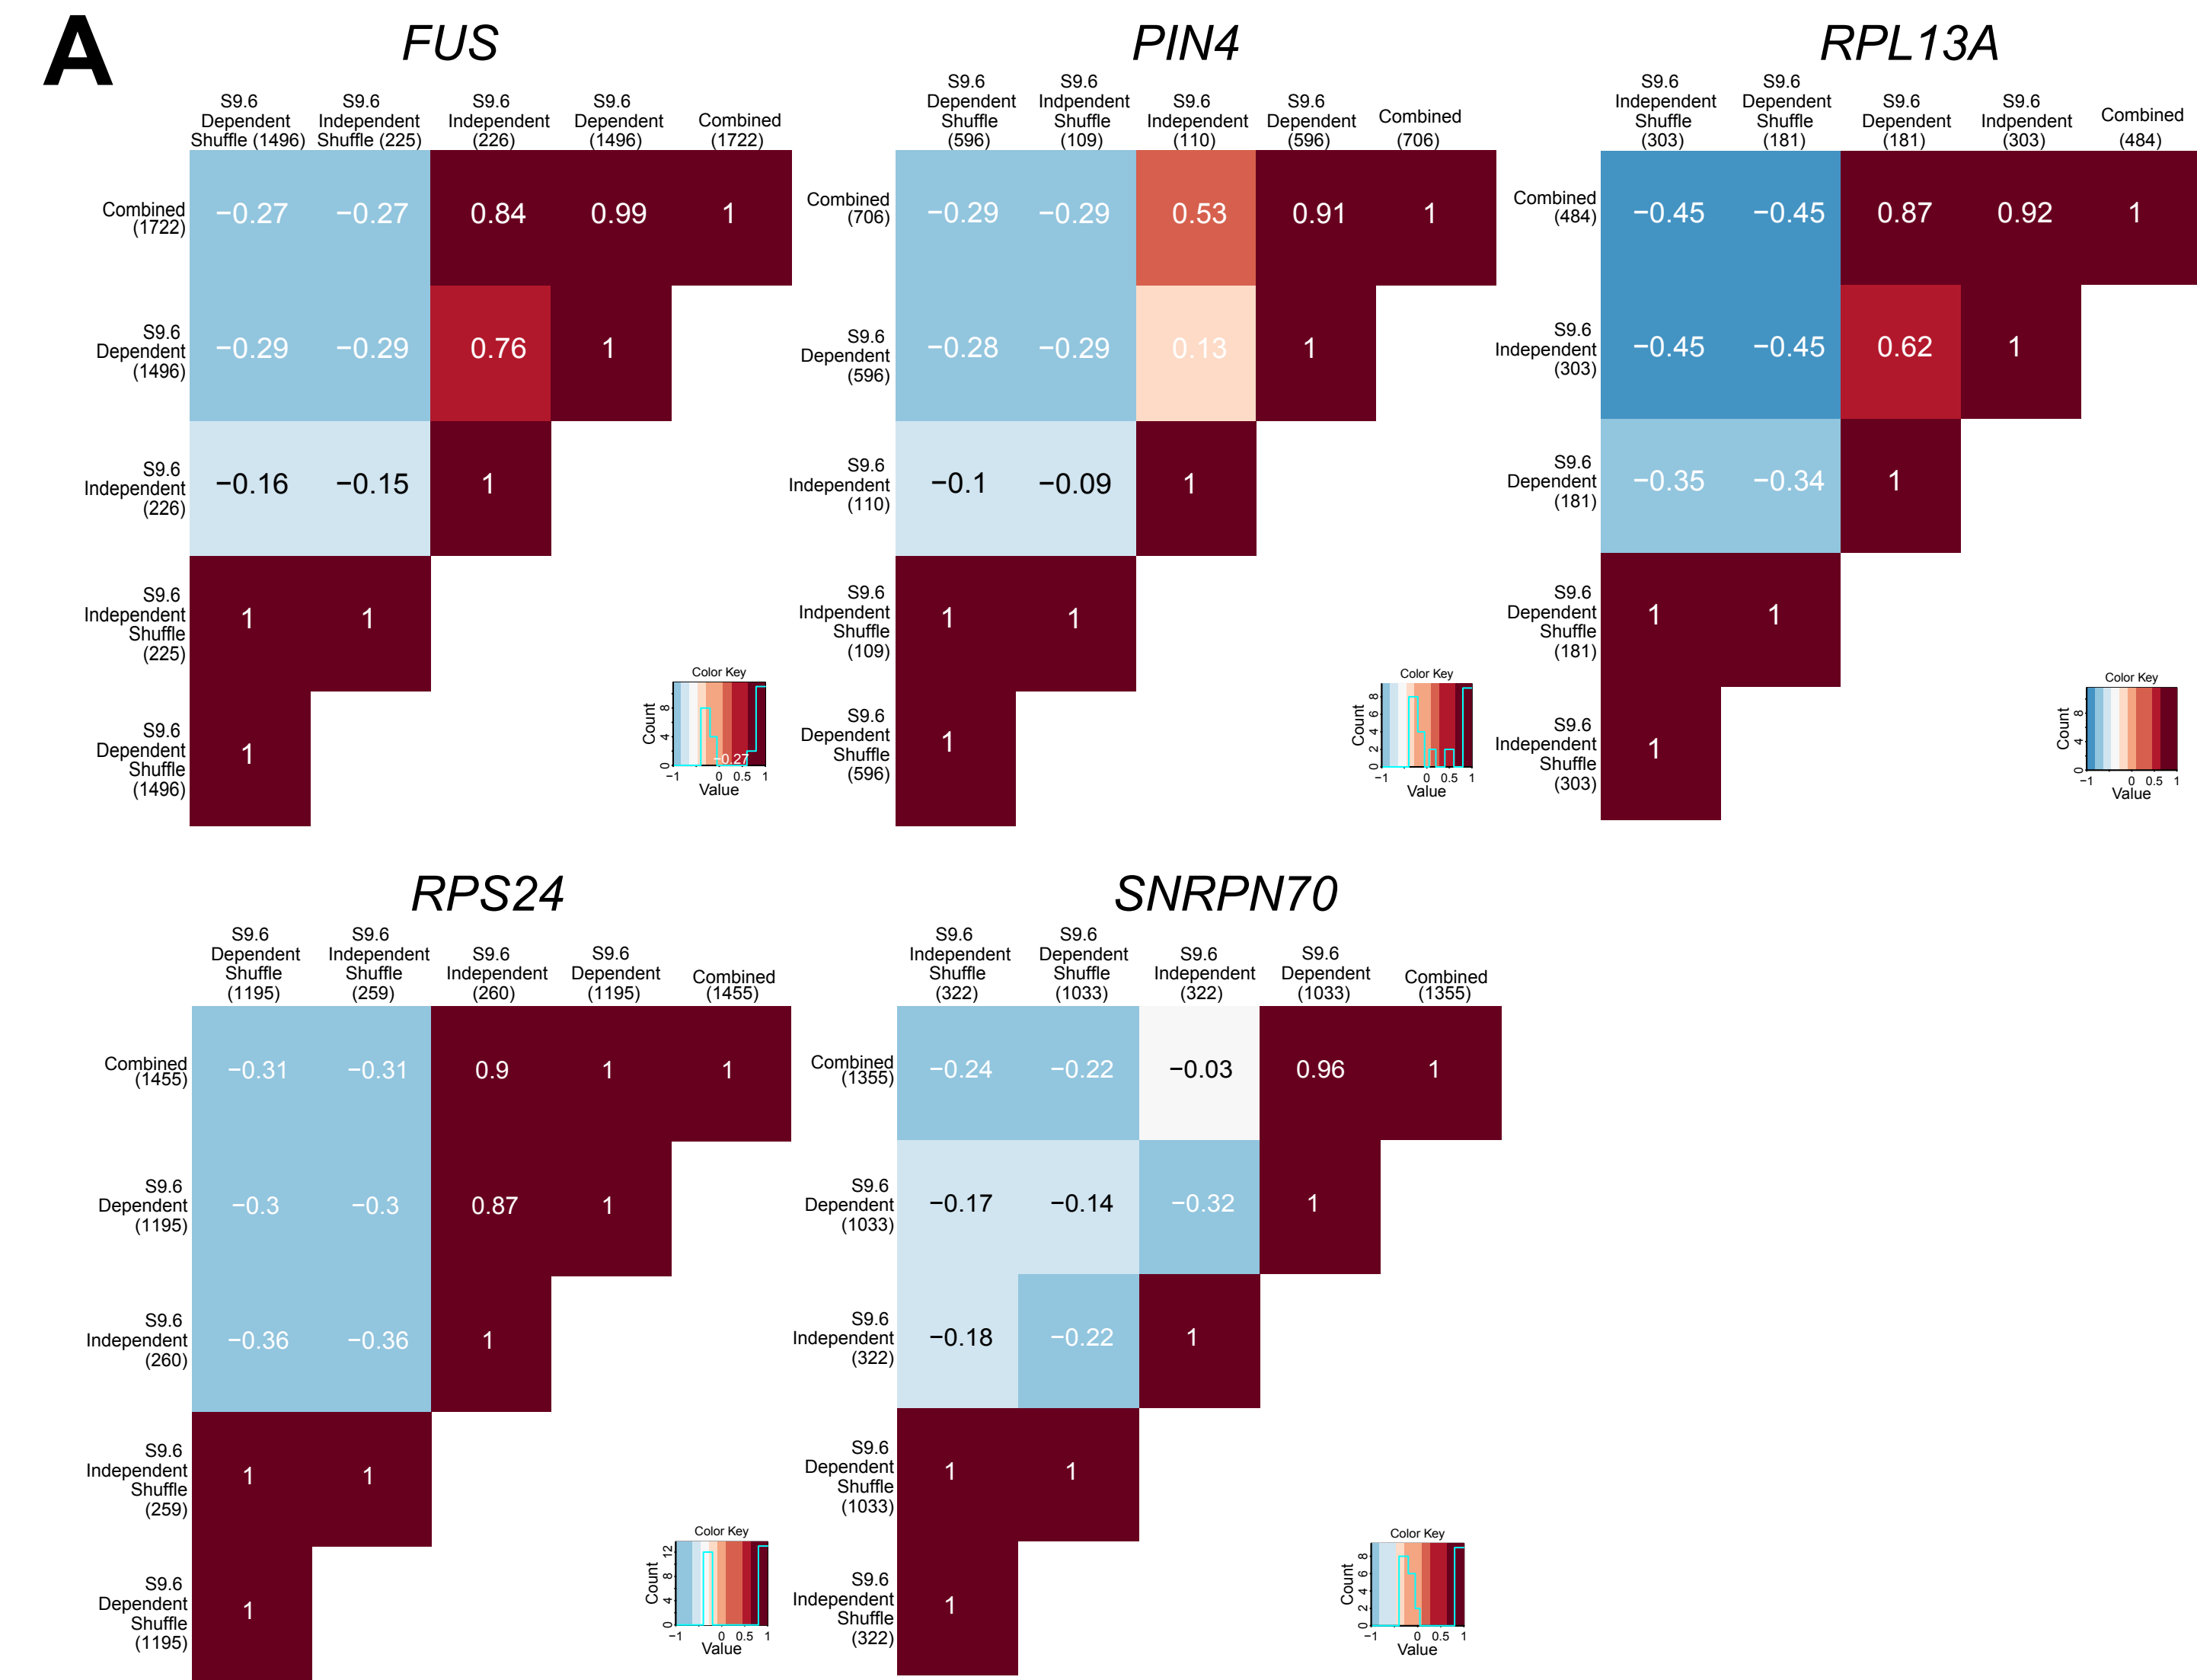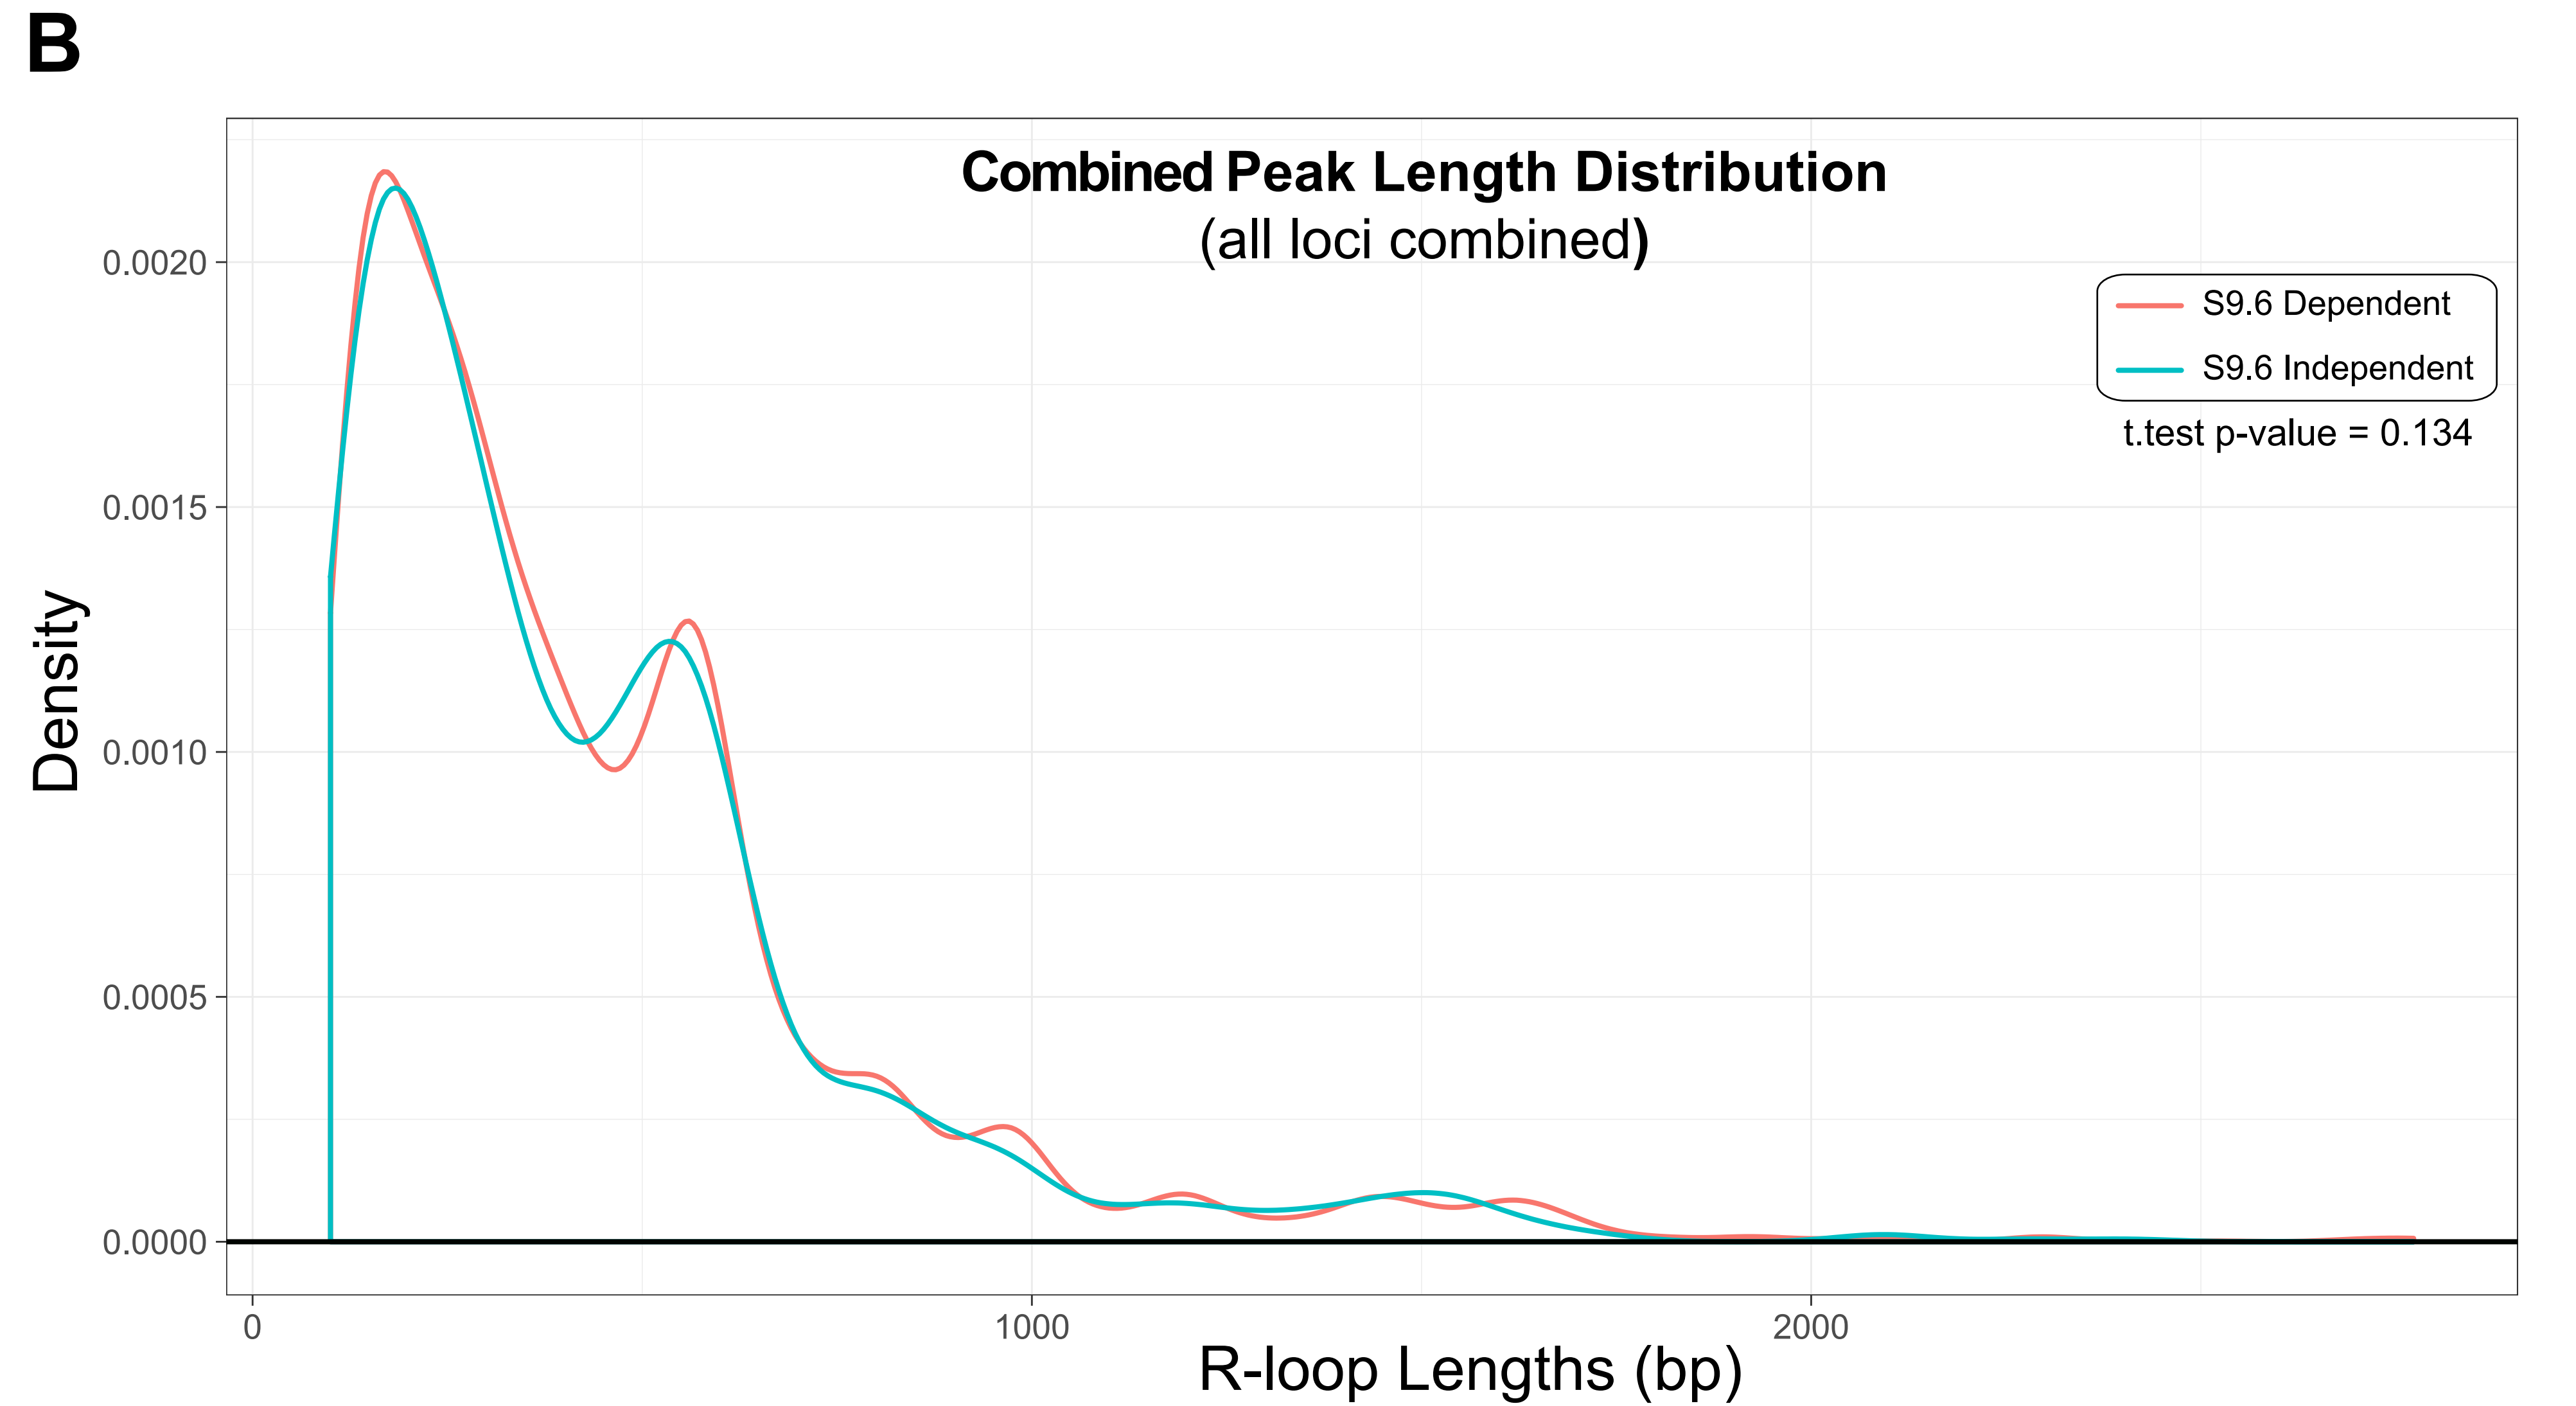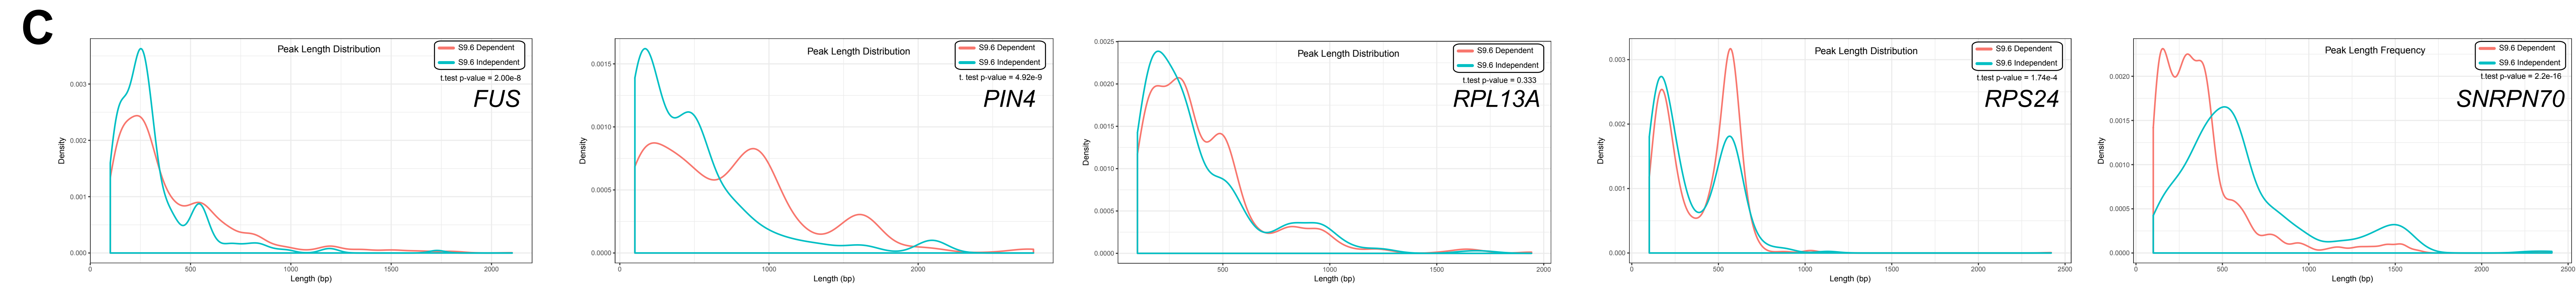

Supplement: NIHMS1568681-supplement-4.pdf [file NIHMS1568681-supplement-4.pdf]

Figure S5

**A**

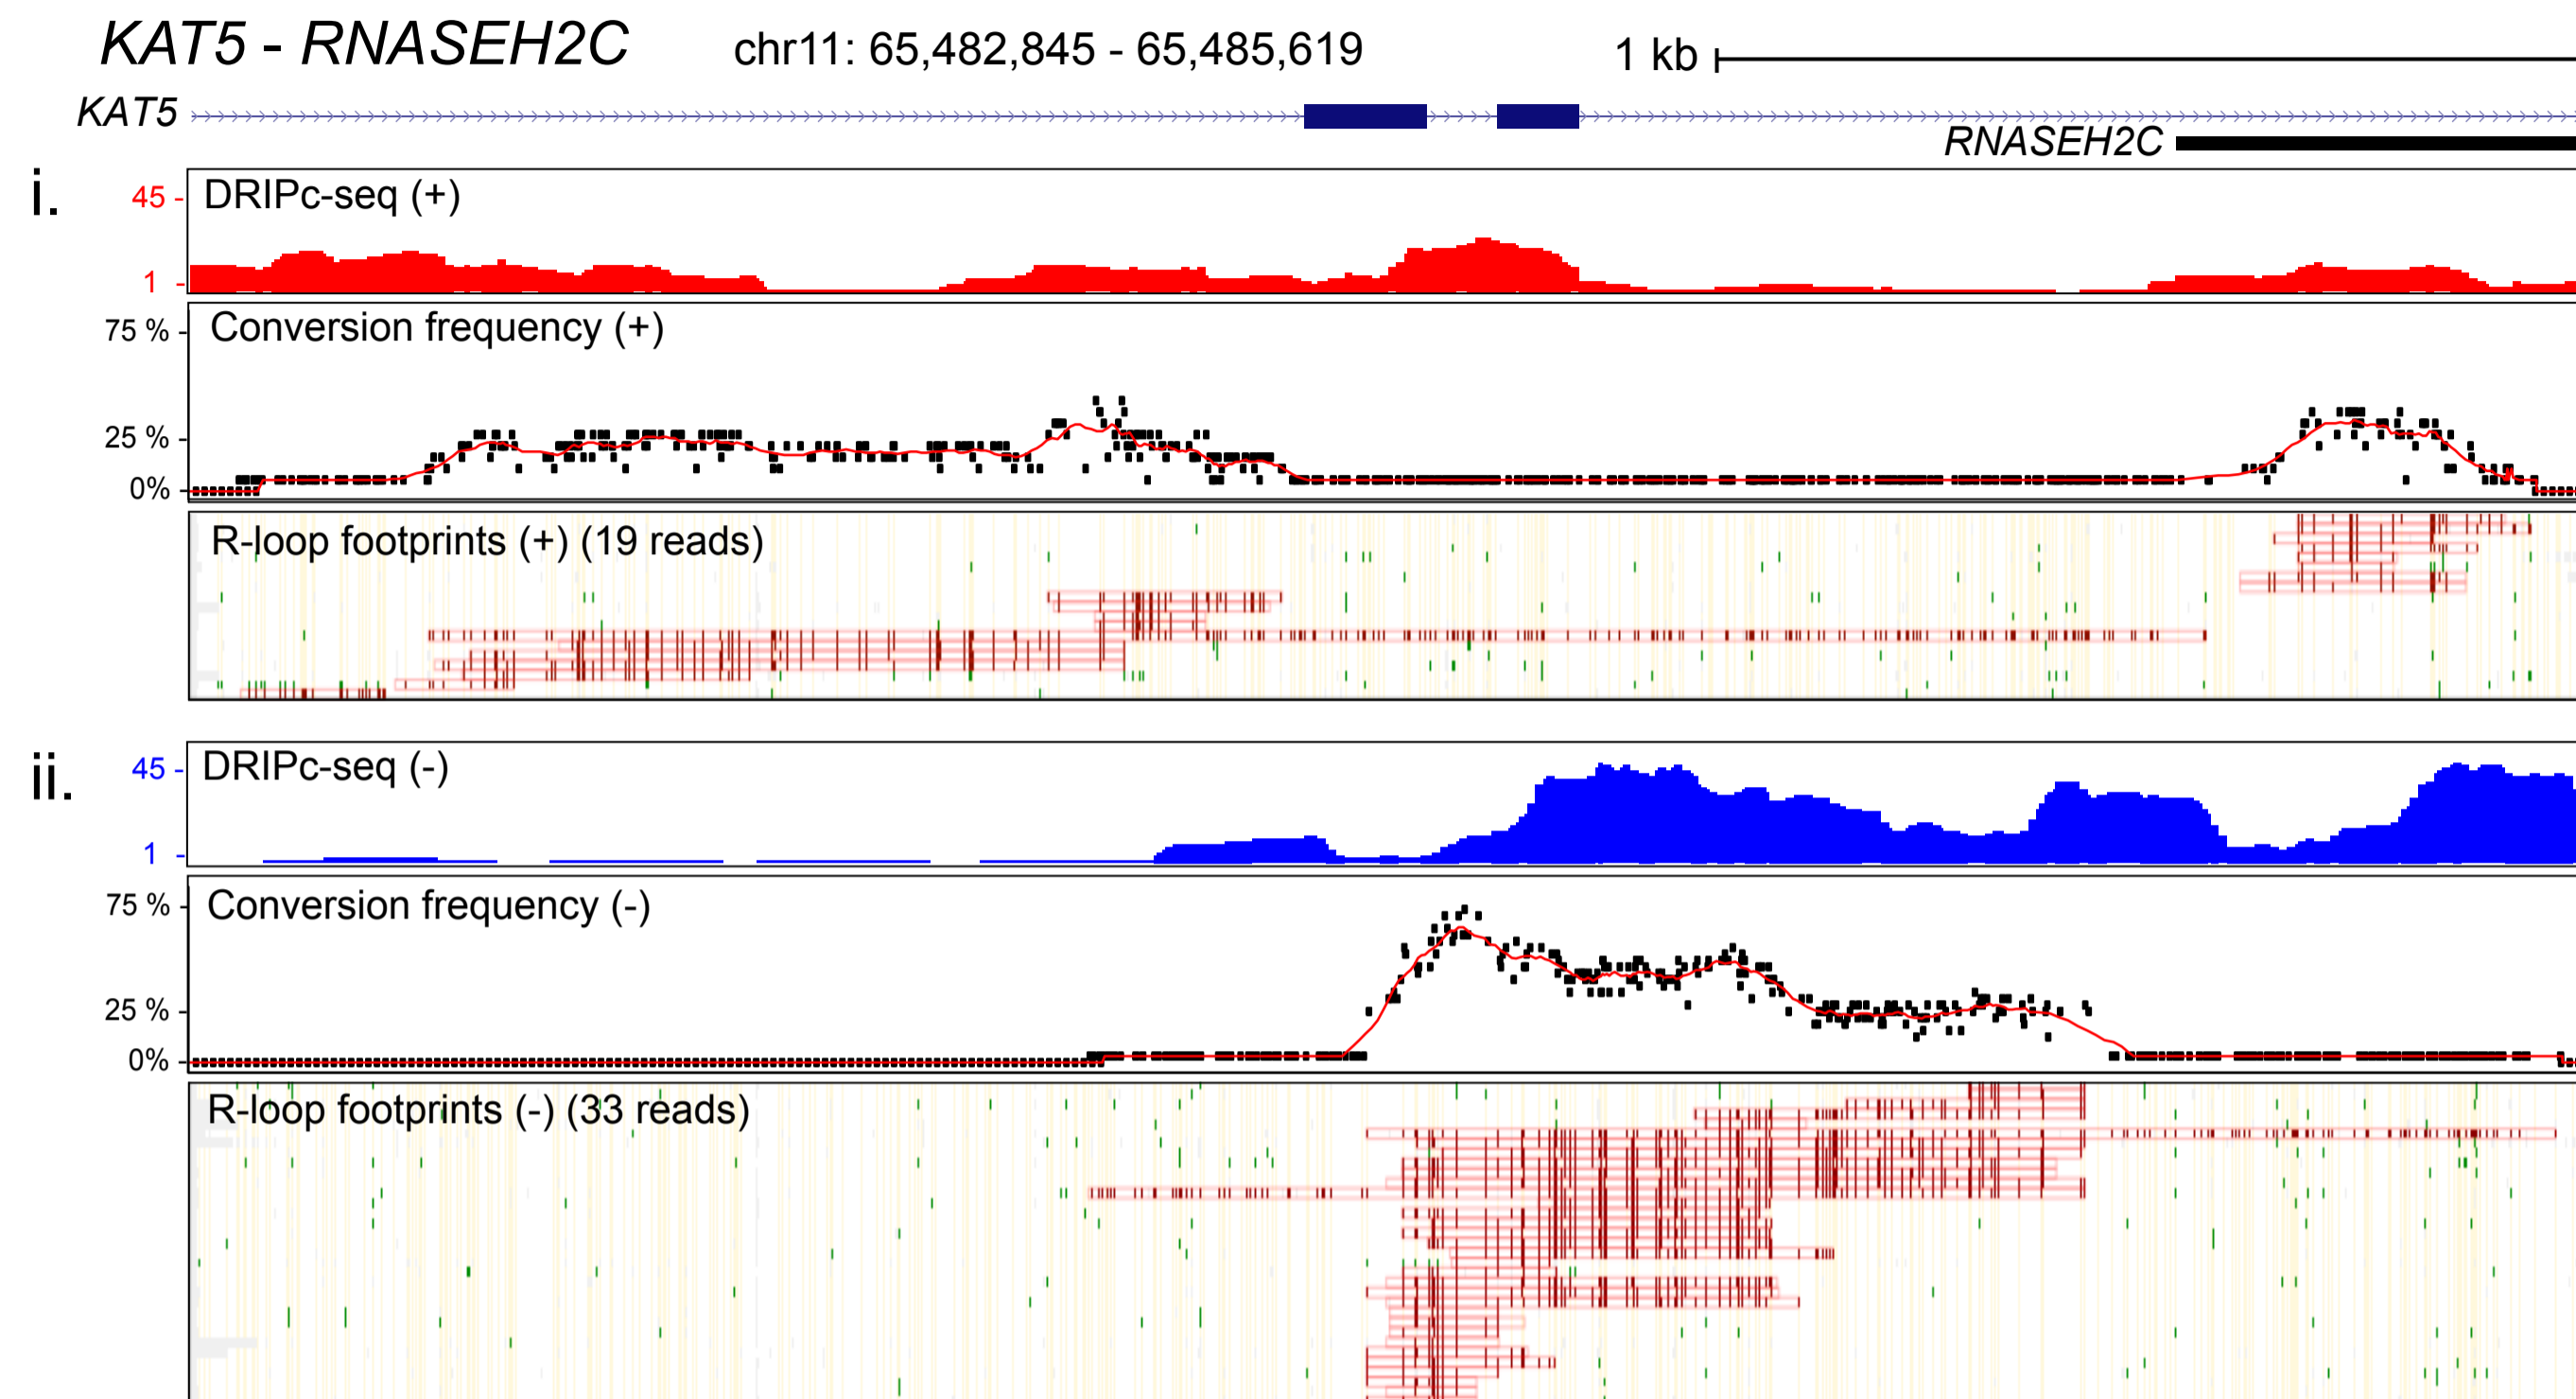

**B**

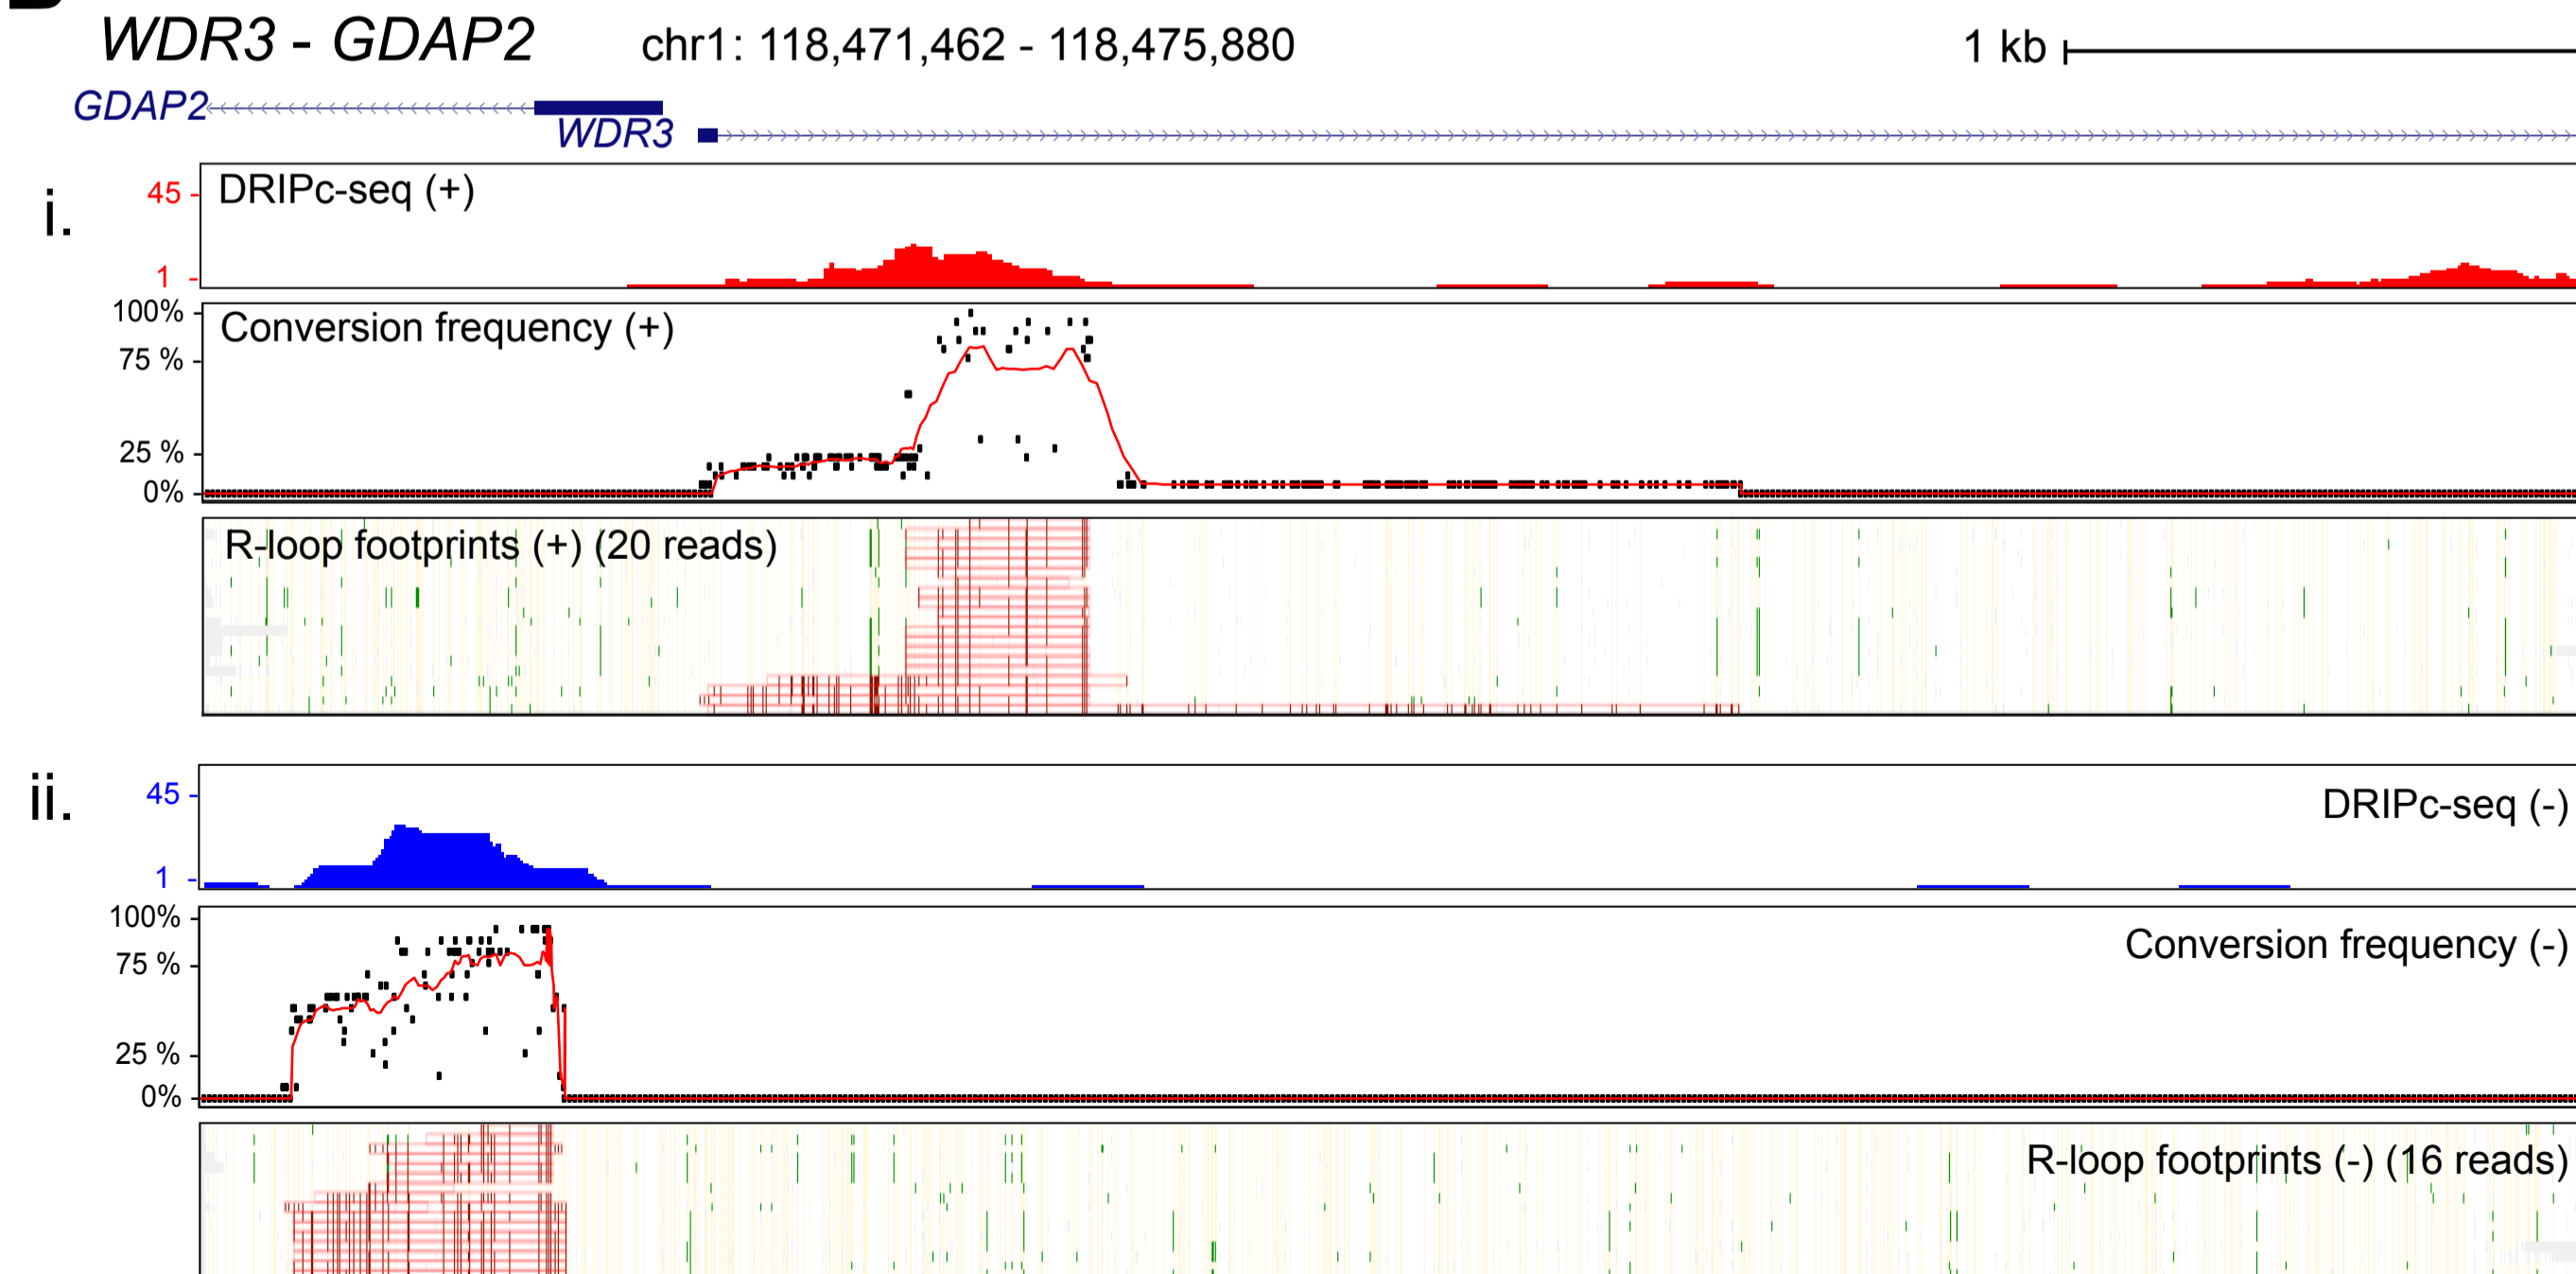

**C**

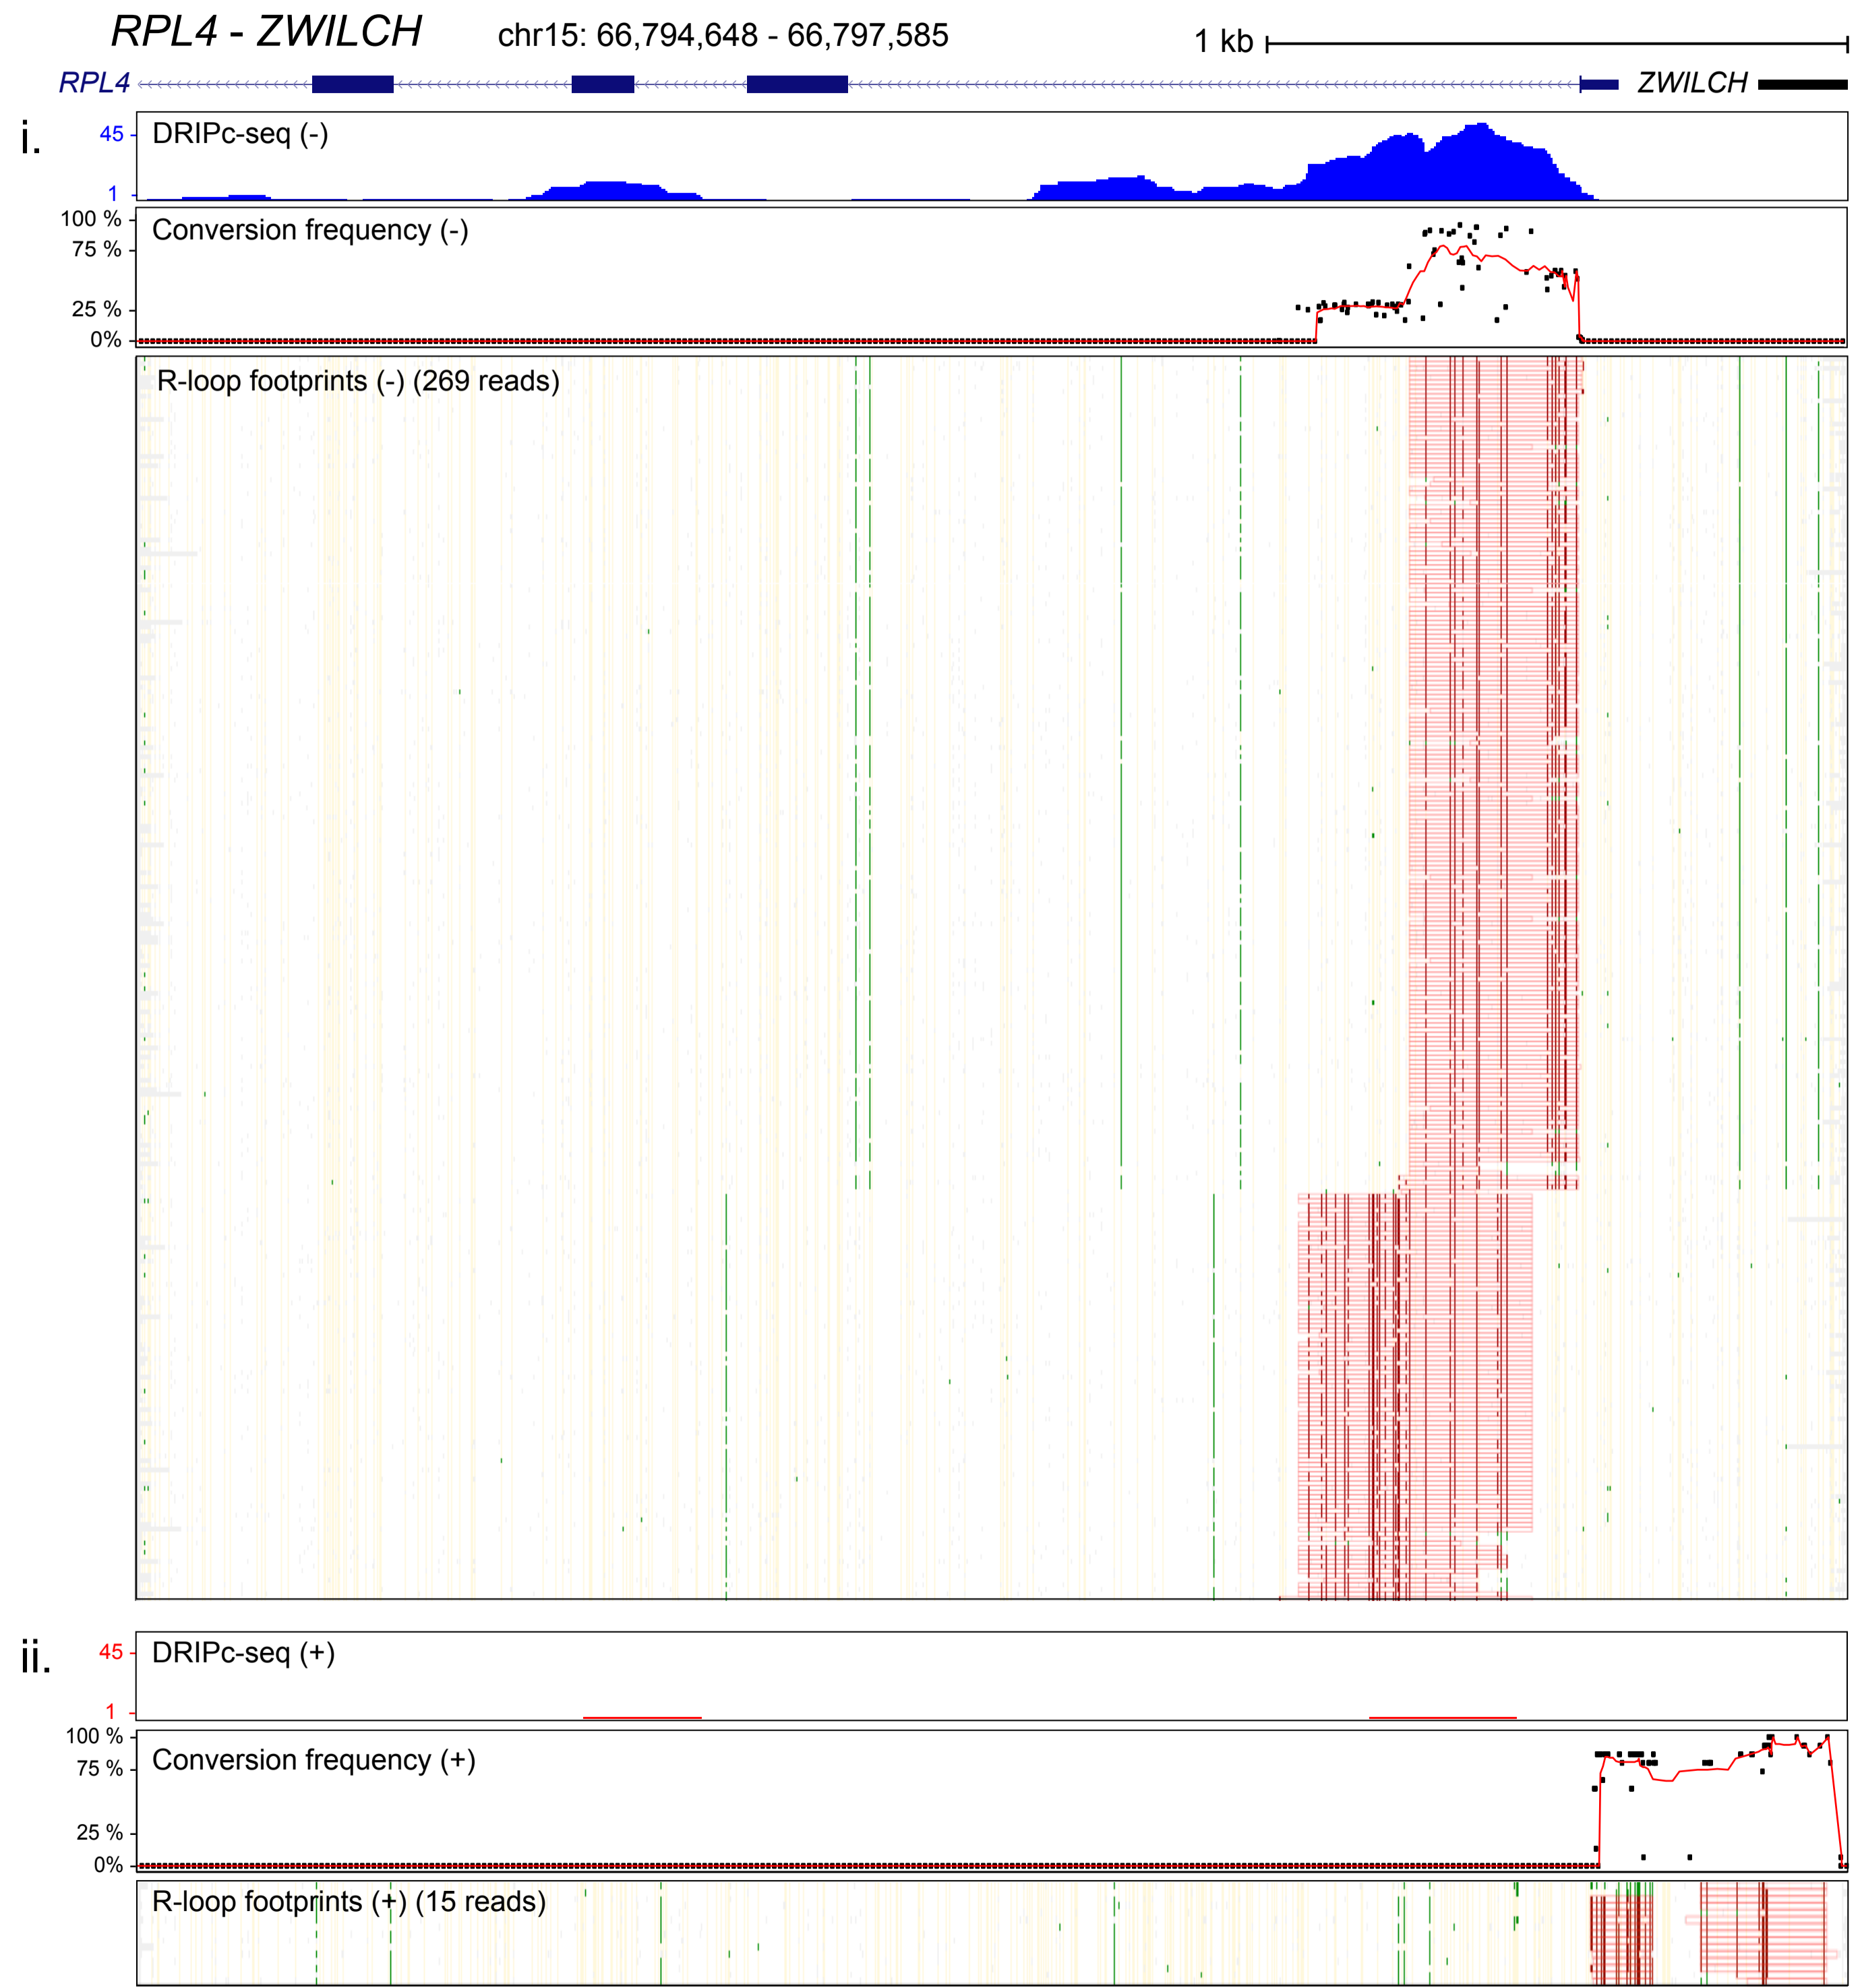

Supplement: NIHMS1568681-supplement-5.pdf [file NIHMS1568681-supplement-5.pdf]

Figure S6

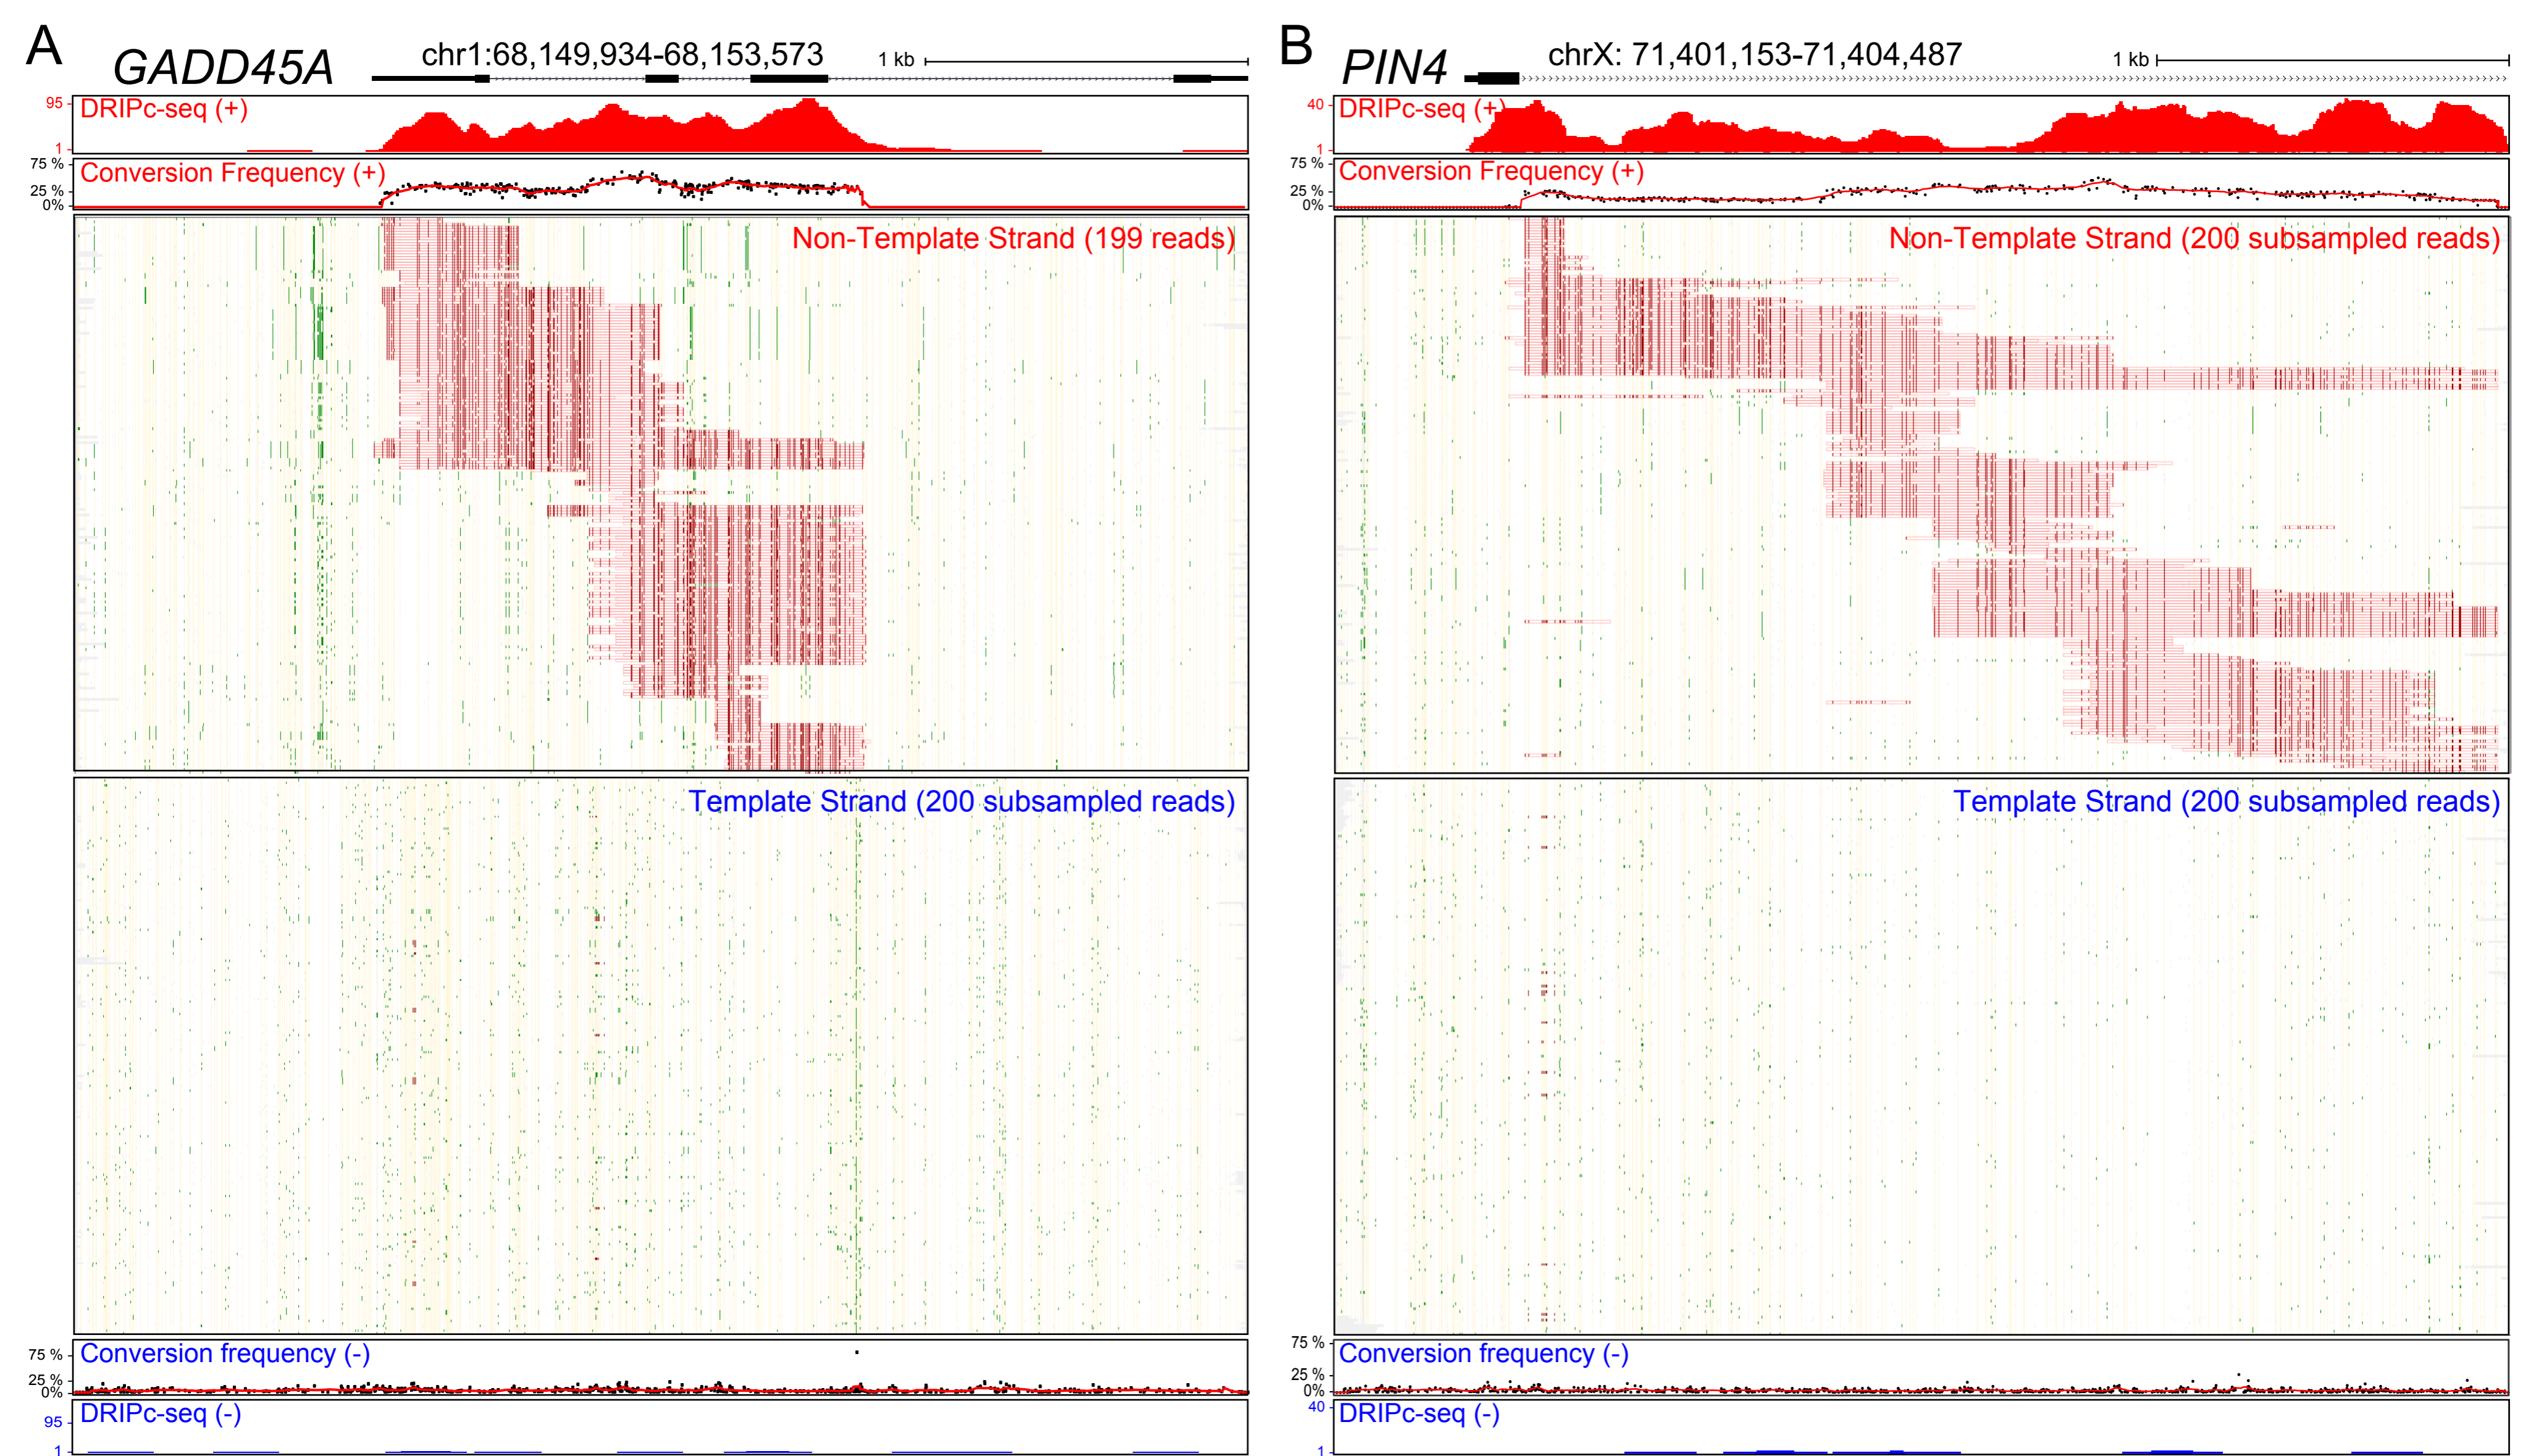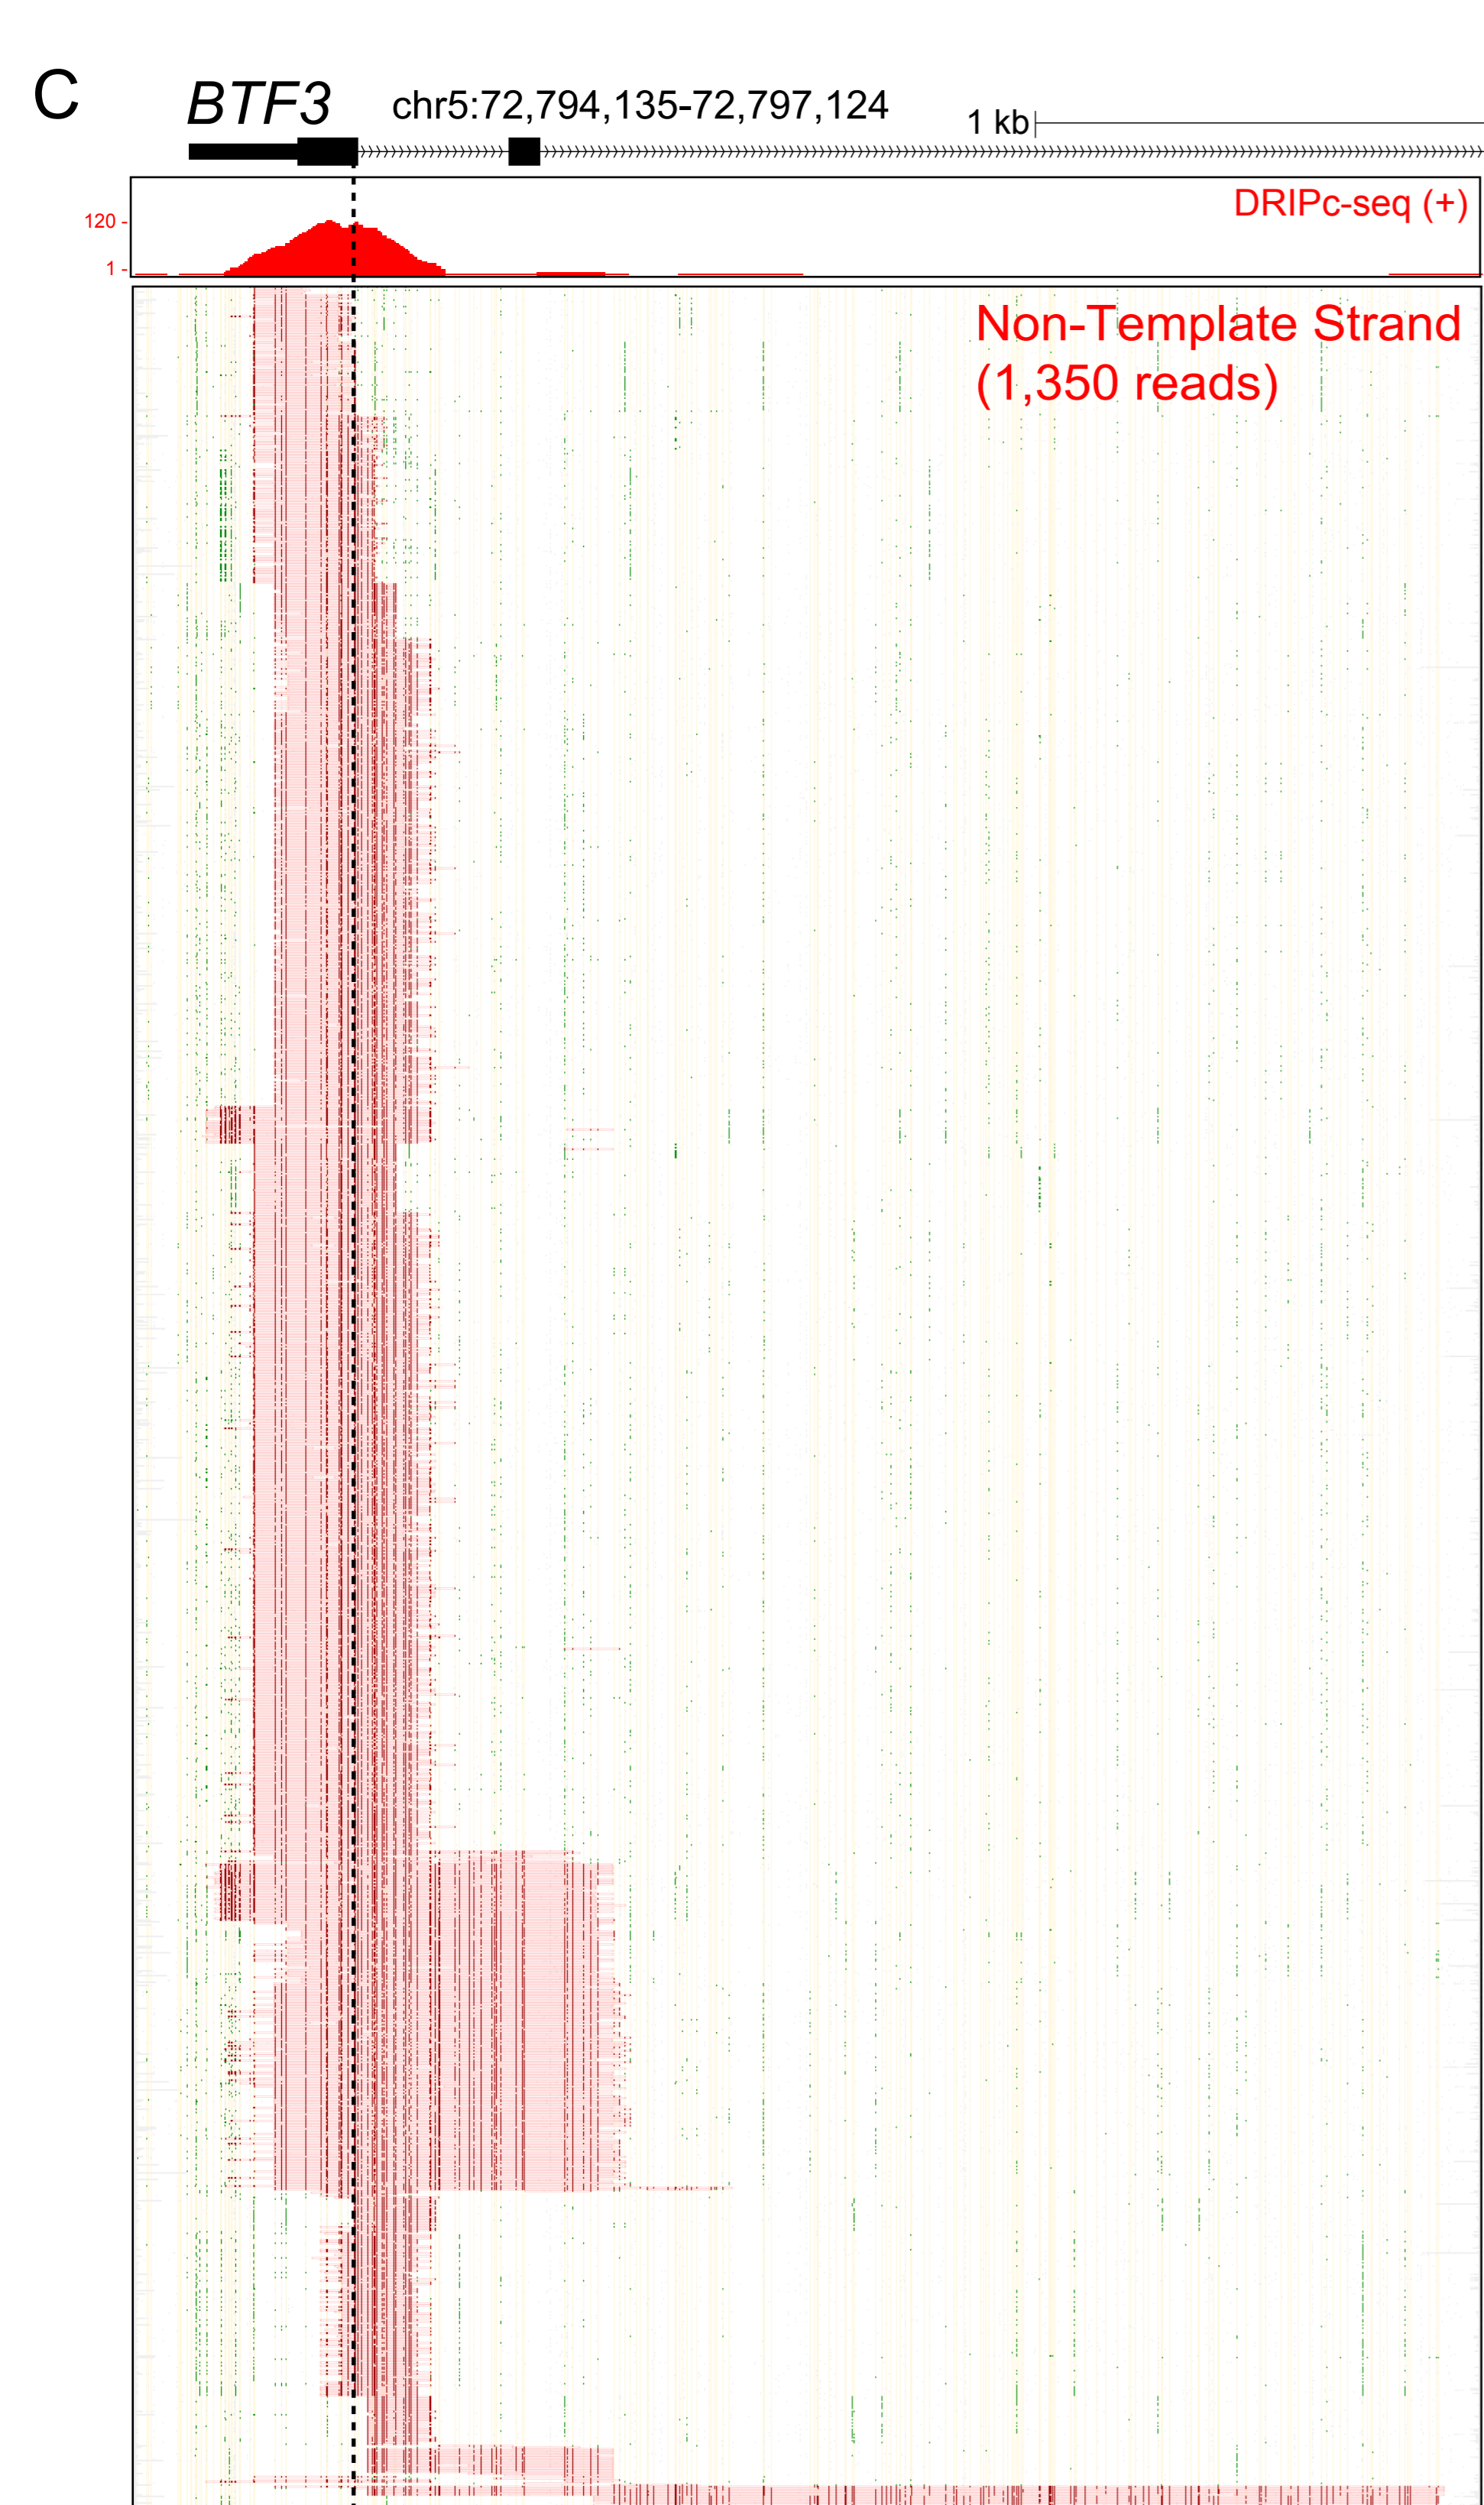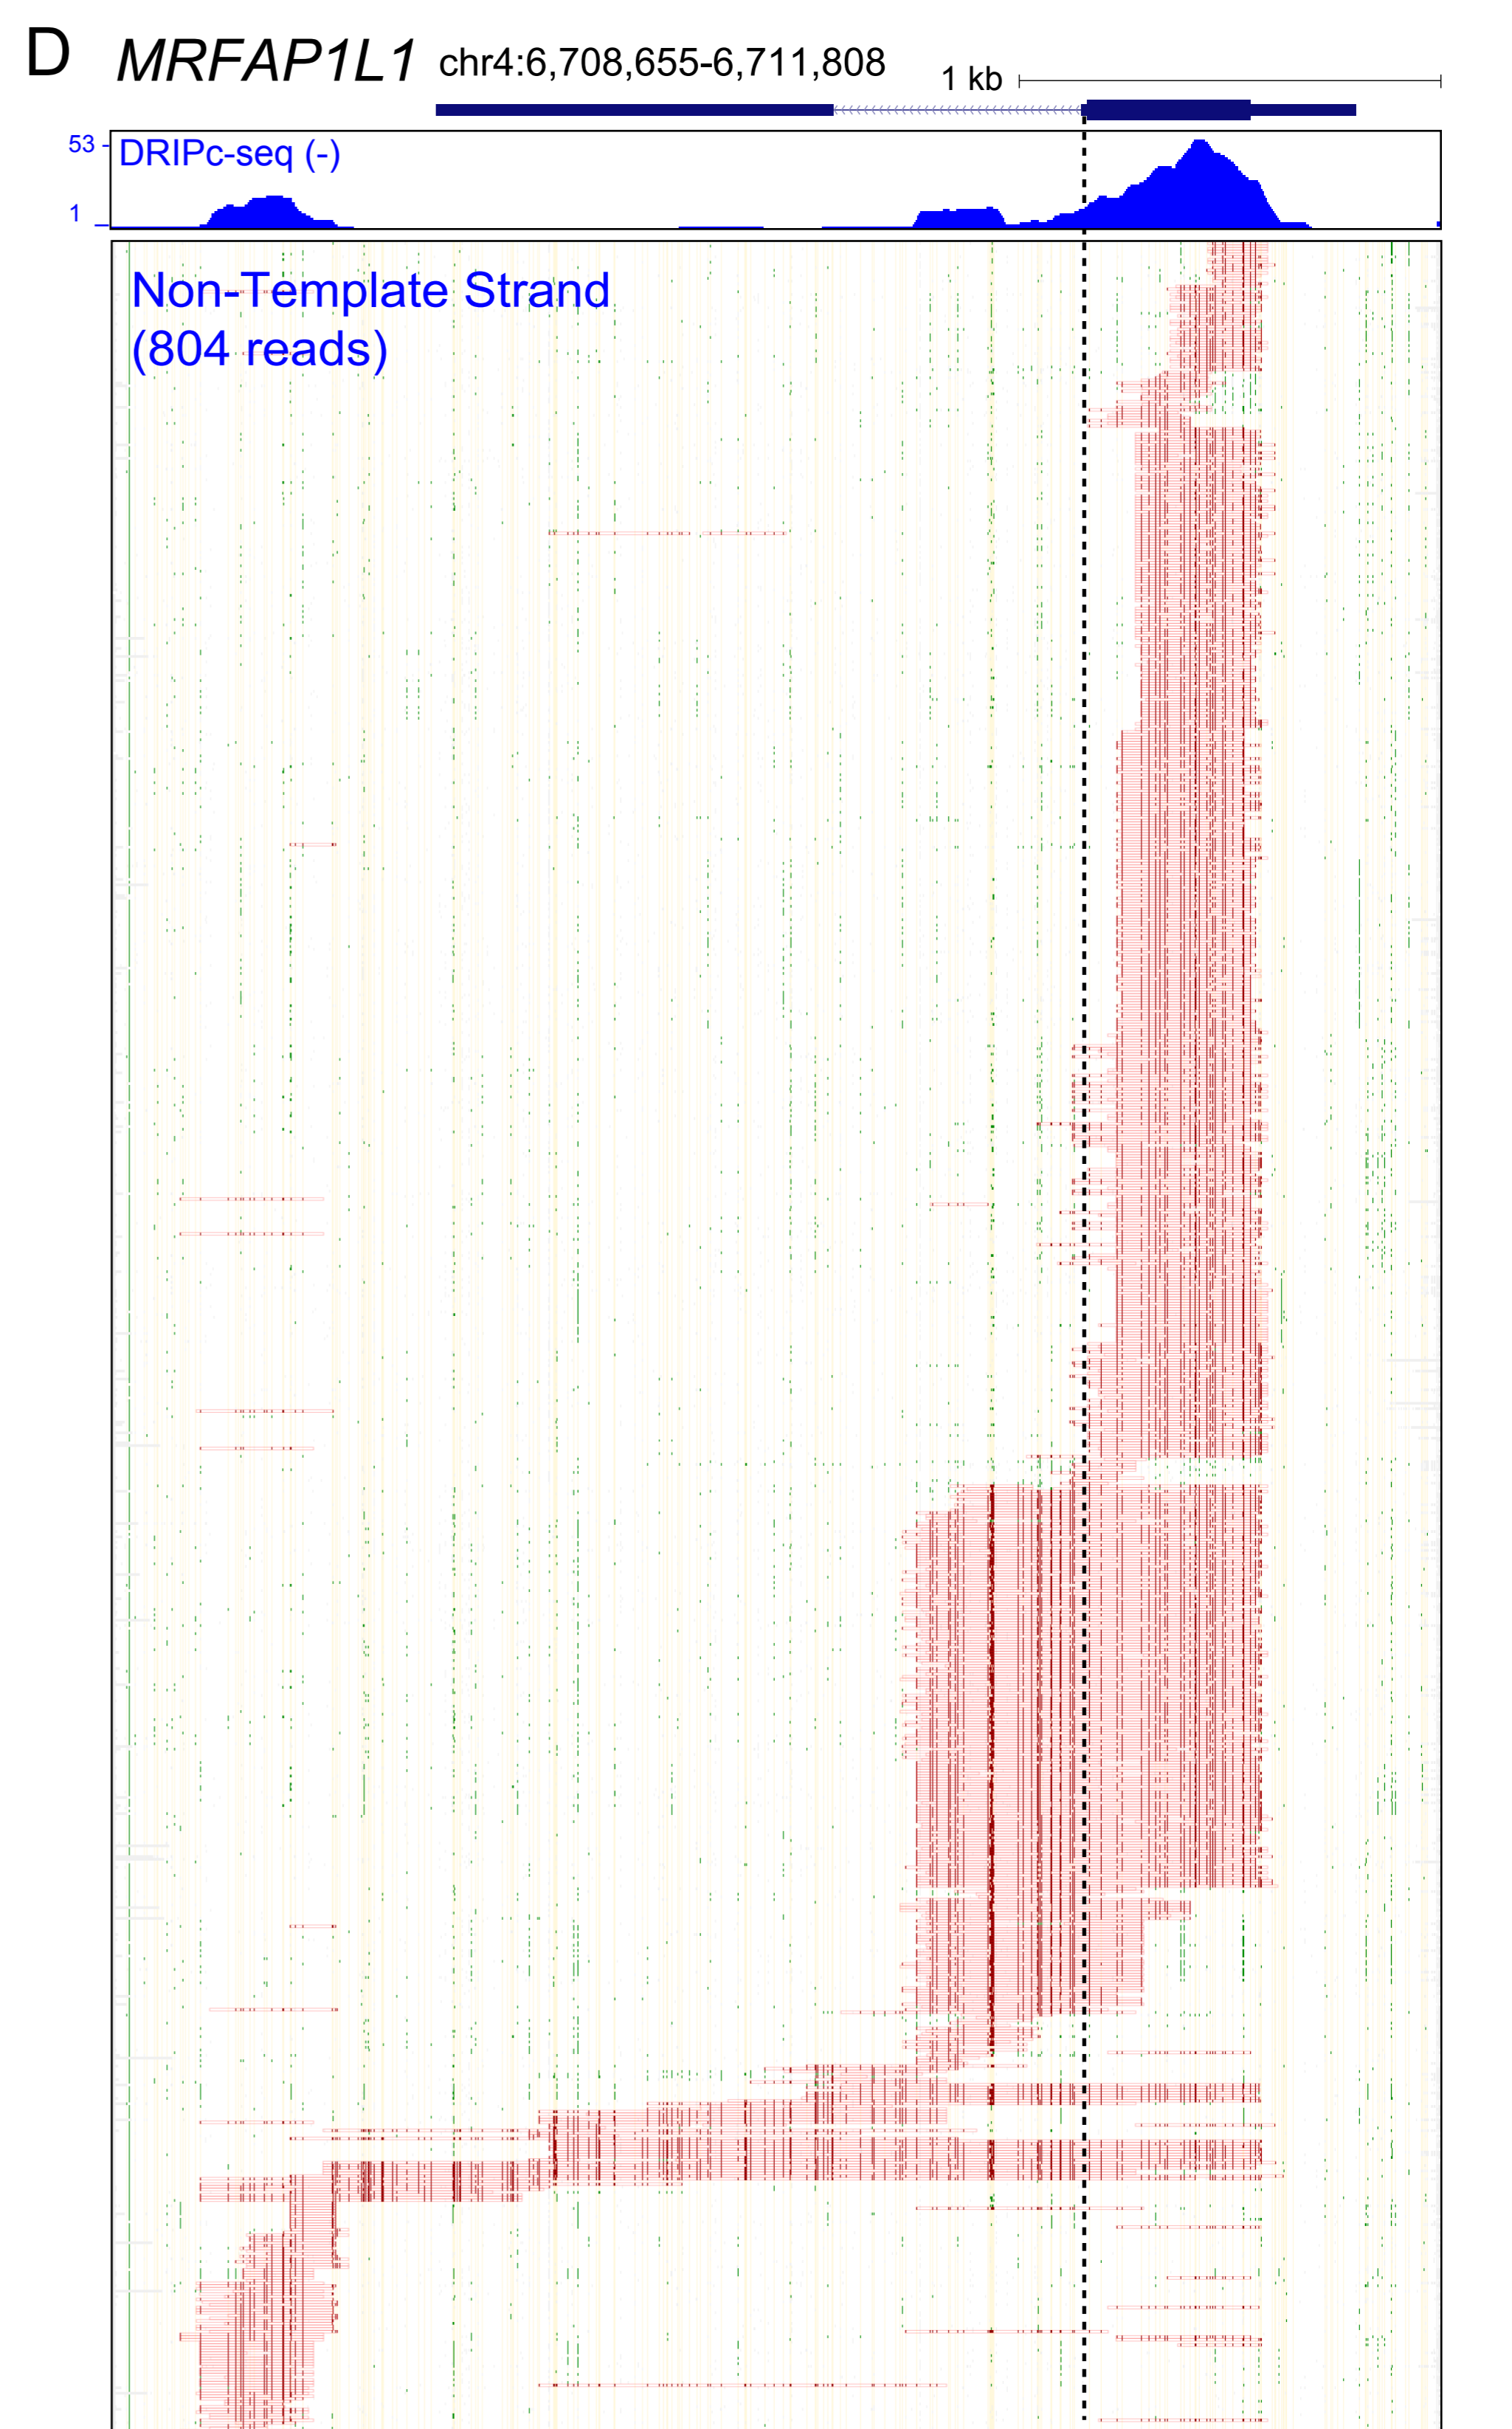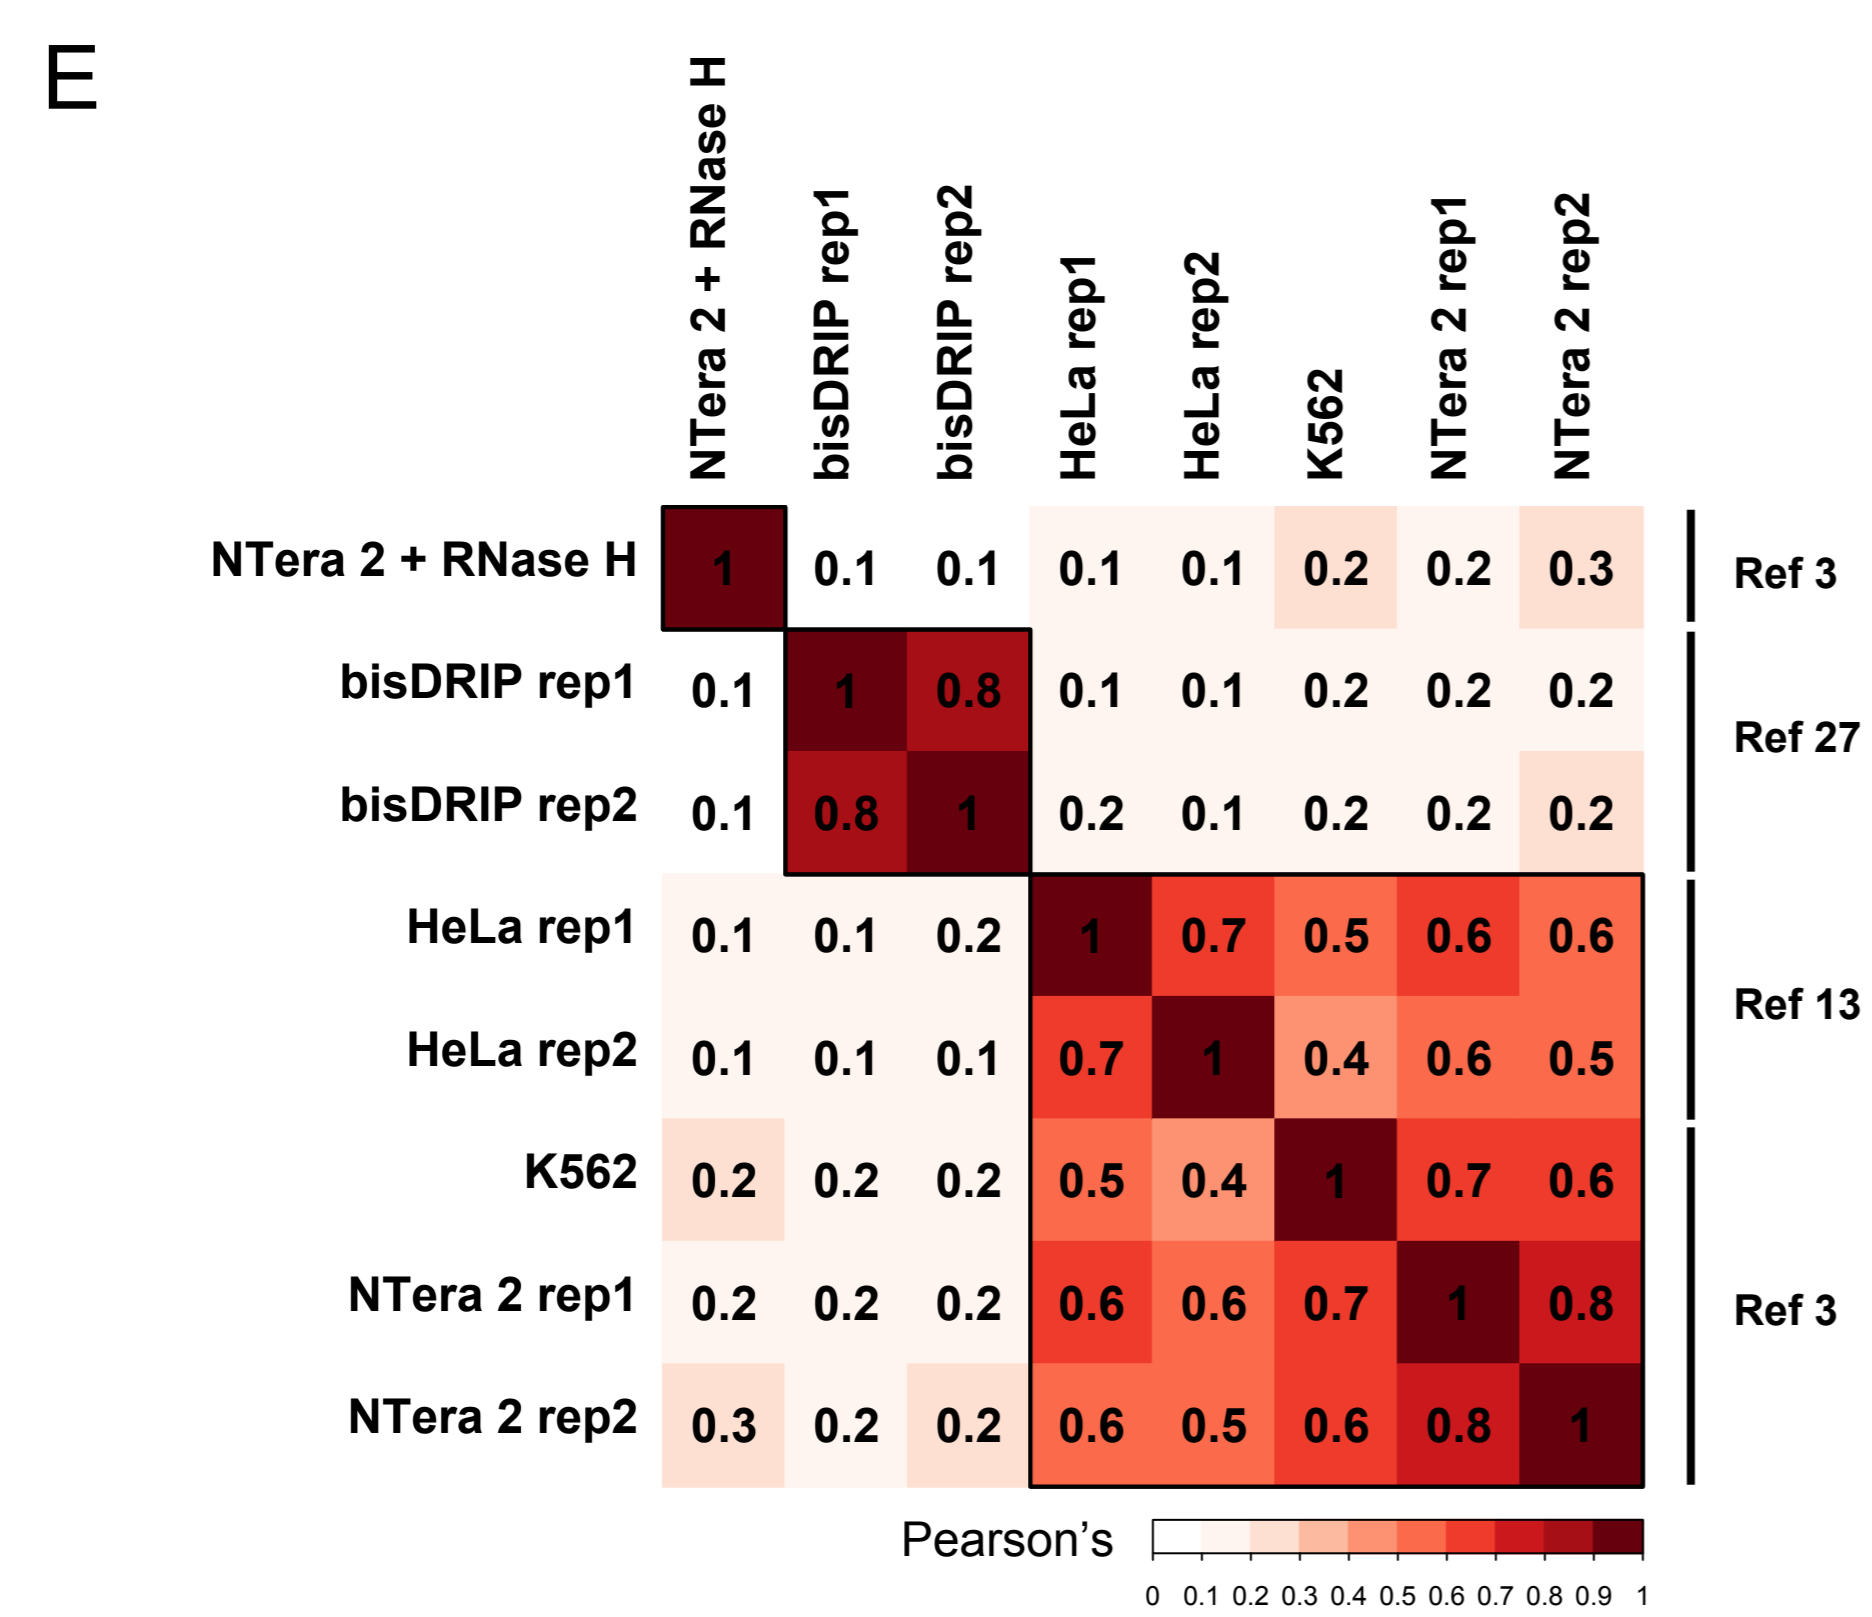

Supplement: NIHMS1568681-supplement-6.pdf [file NIHMS1568681-supplement-6.pdf]

Figure S7

A.

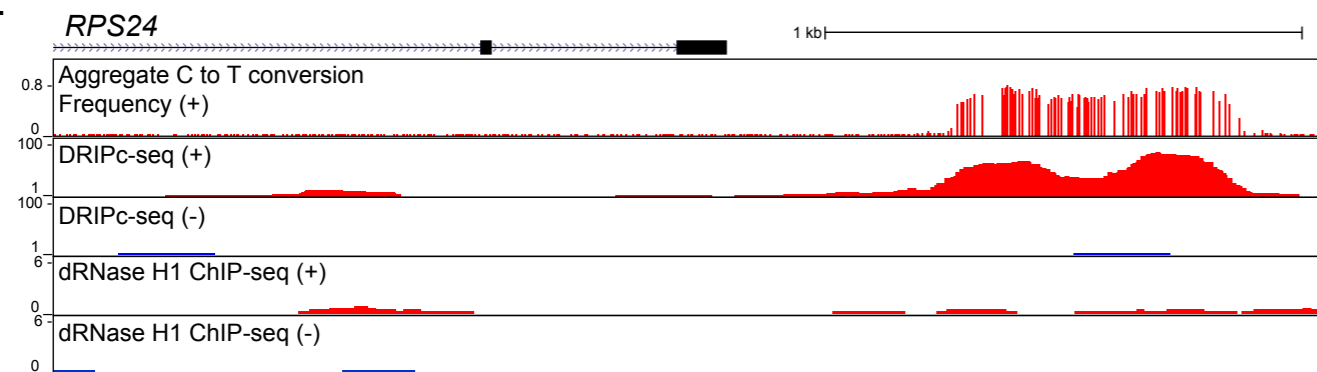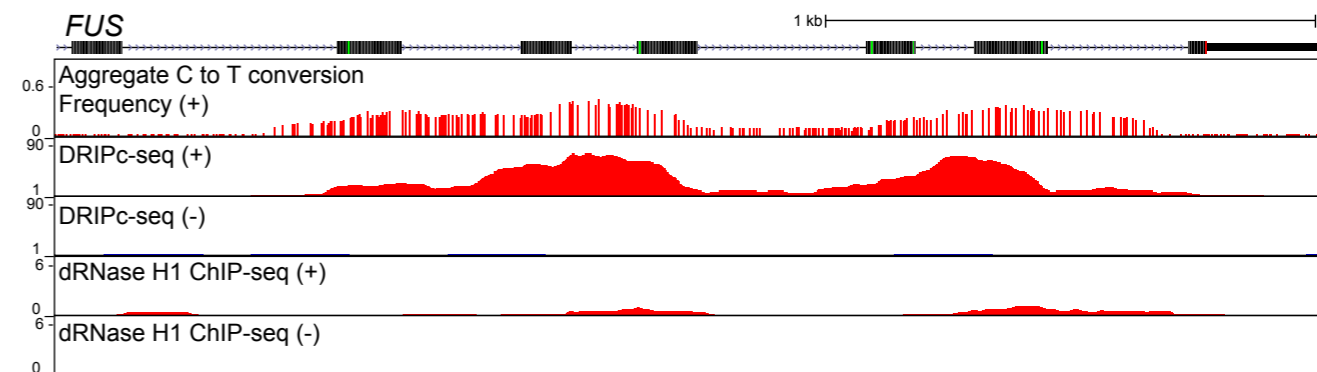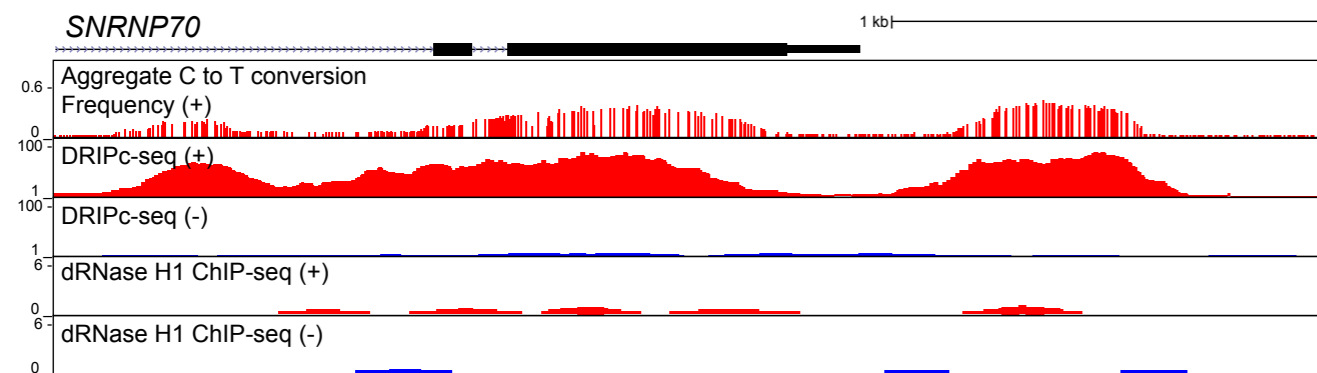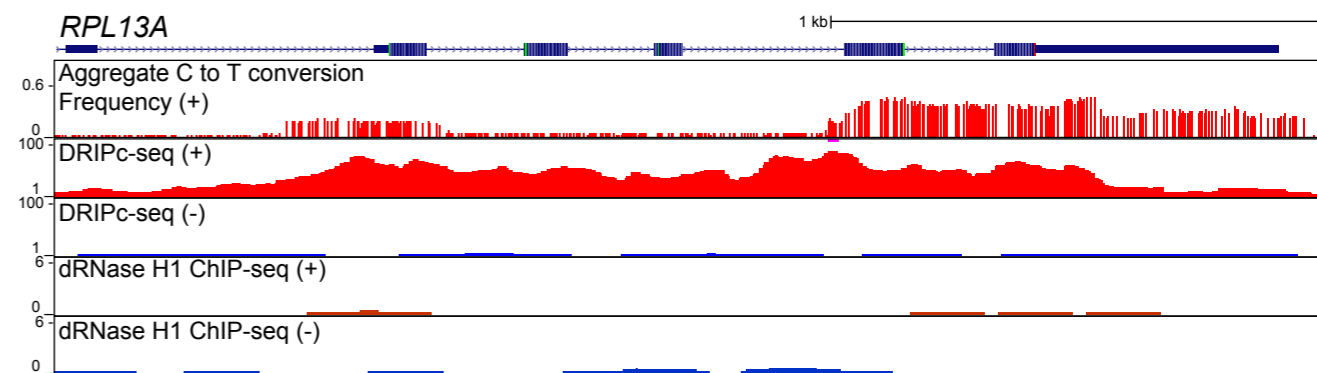

B.

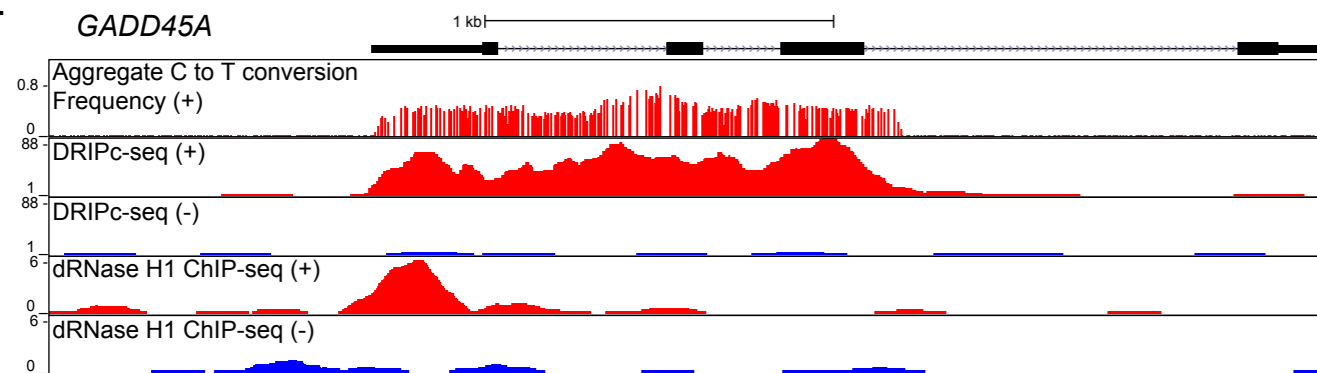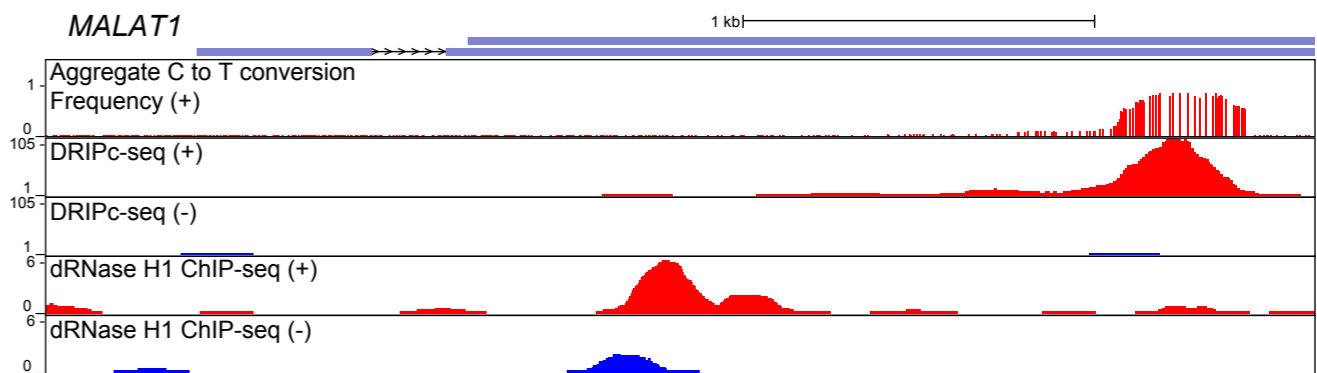

Supplement: NIHMS1568681-supplement-7.pdf [file NIHMS1568681-supplement-7.pdf]

# Figure S8

A.

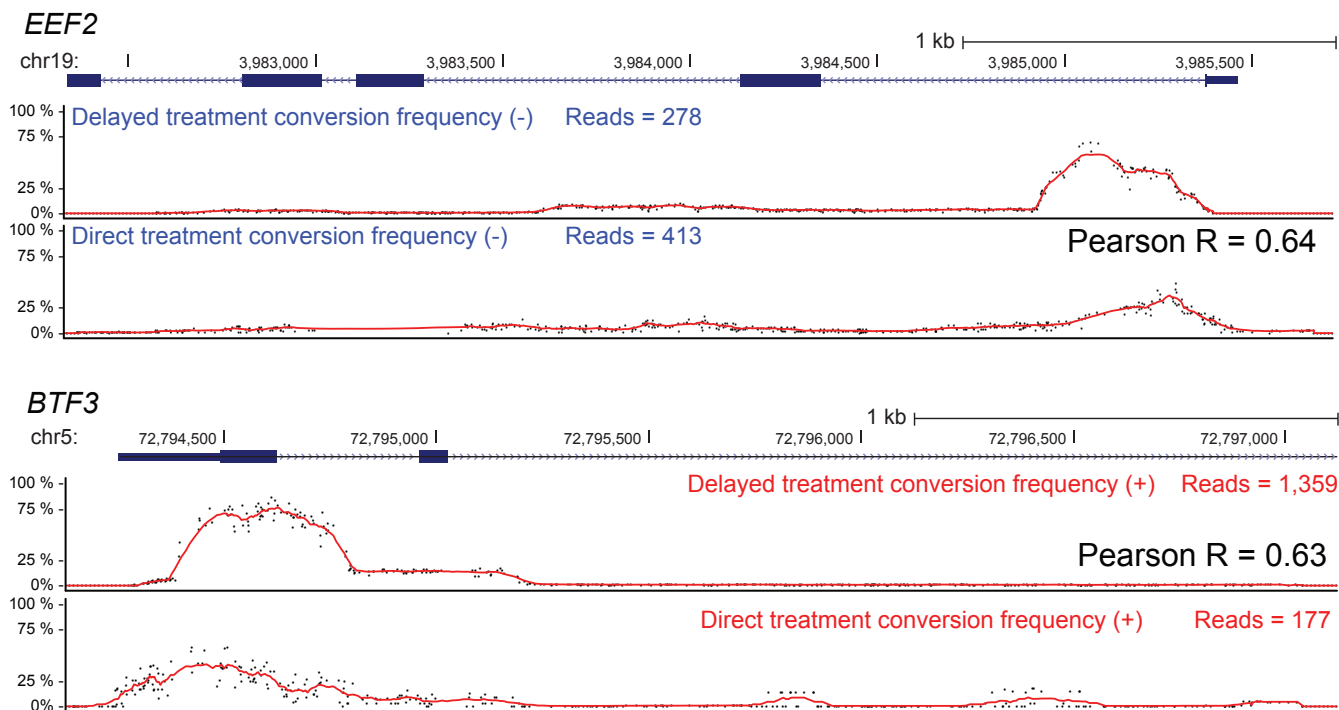

B.

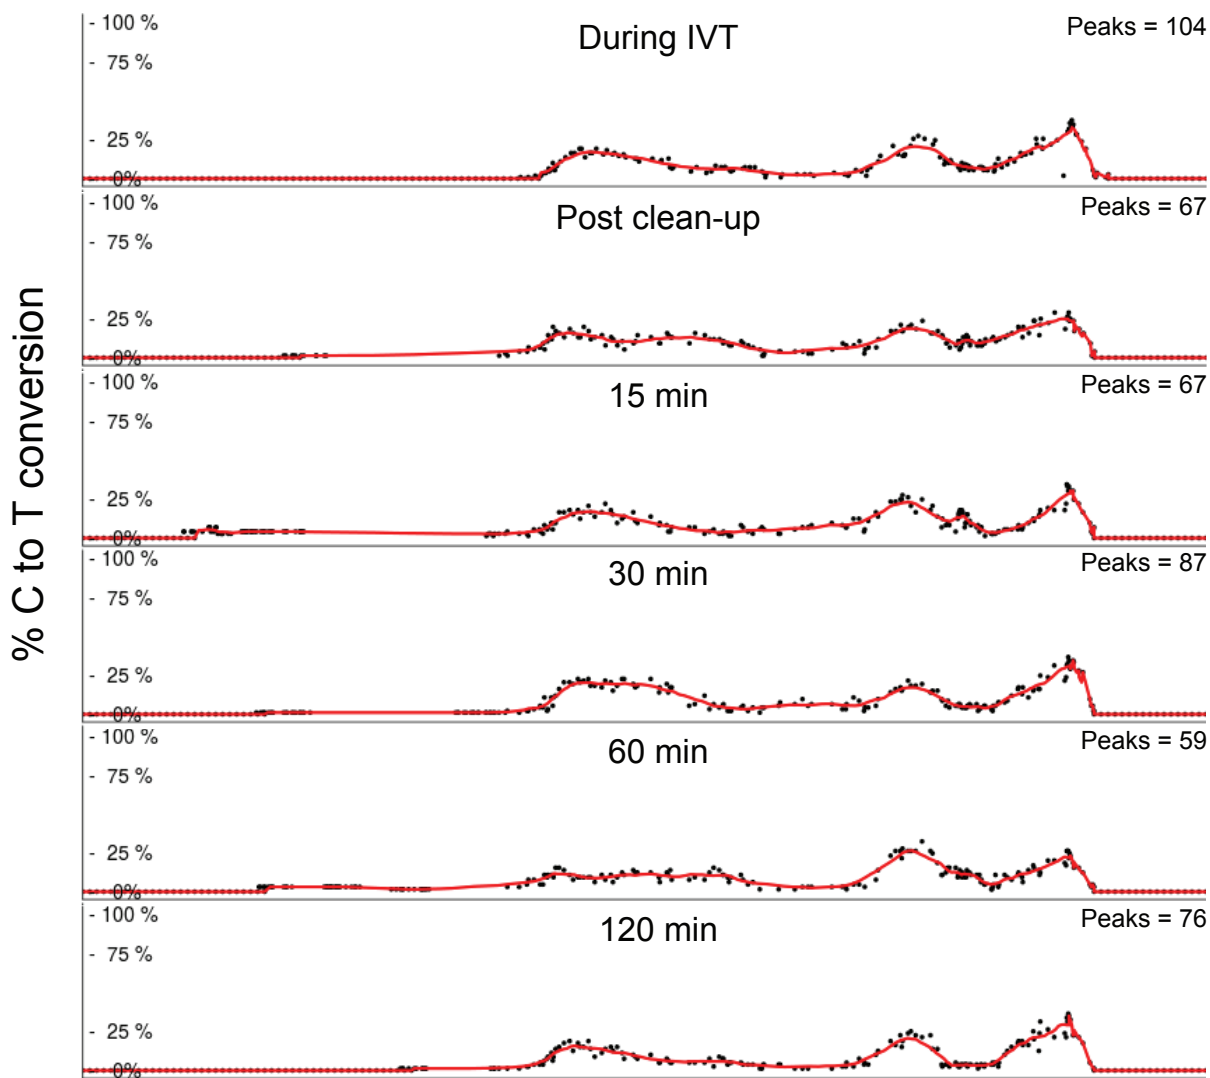

Supplement: NIHMS1568681-supplement-8.pdf [file NIHMS1568681-supplement-8.pdf]

Figure S9

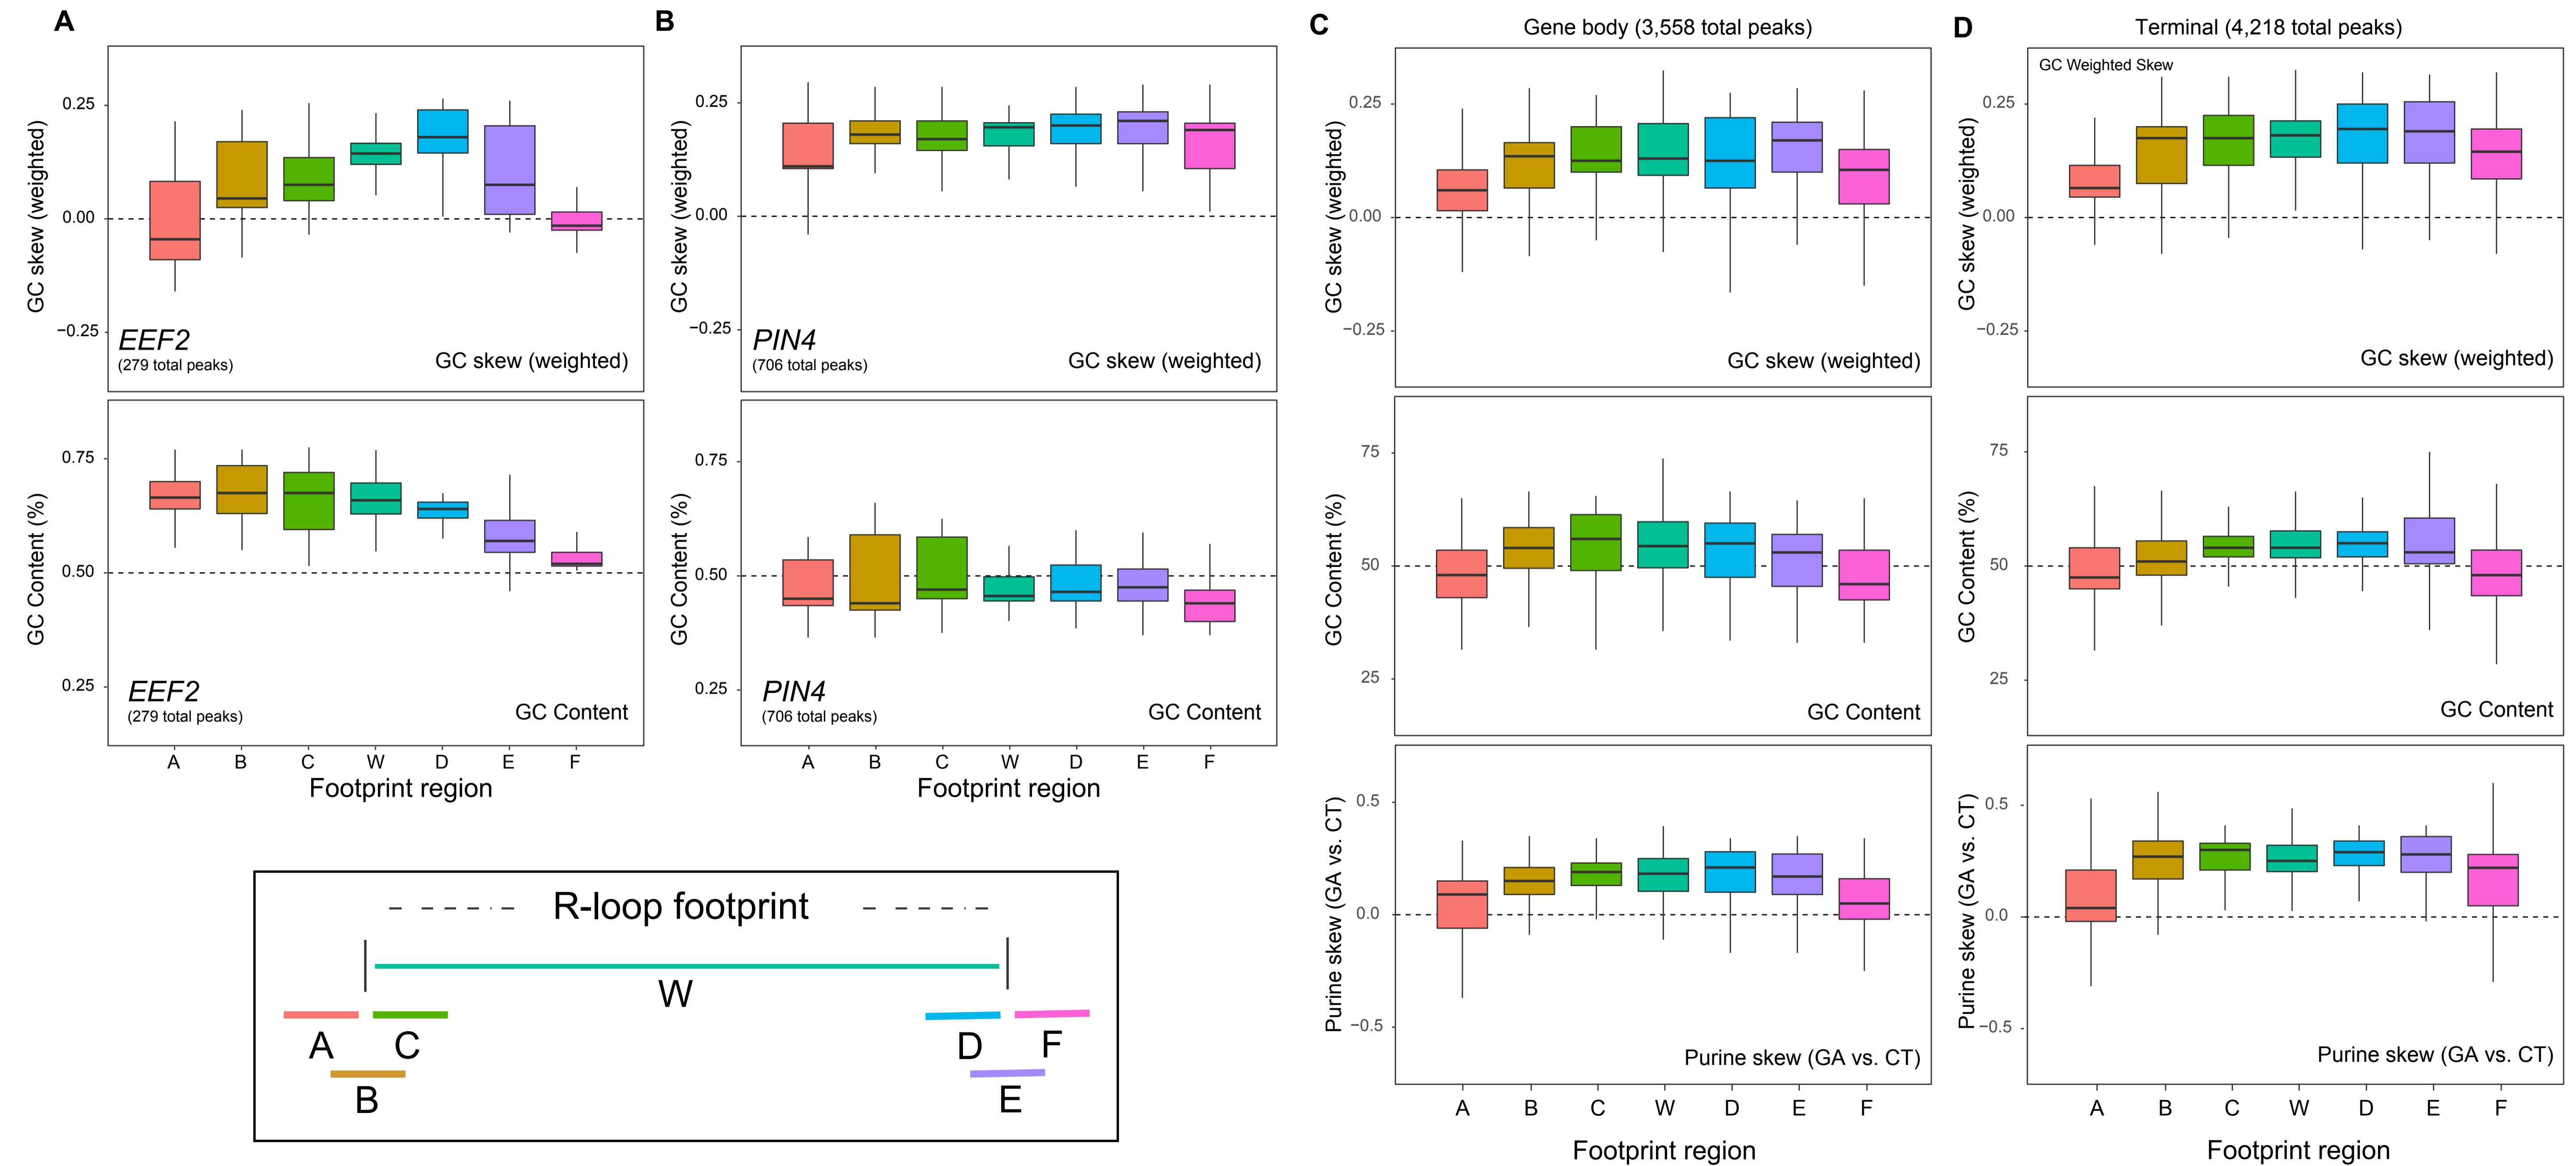

Supplement: NIHMS1568681-supplement-9.pdf [file NIHMS1568681-supplement-9.pdf]
